1 Logical modeling of dendritic cells *in*  
2 *vitro* differentiation from human  
3 monocytes unravels novel  
4 transcriptional regulatory interactions

5

6 Karen J. Nuñez-Reza<sup>1</sup>,  
7 Aurélien Naldi<sup>2</sup>,  
8 Arantza Sánchez-Jiménez<sup>1</sup>,  
9 Ana V. Leon-Apodaca<sup>1</sup>,  
10 M. Angélica Santana<sup>3</sup>,  
11 Morgane Thomas-Chollier<sup>2</sup>,  
12 Denis Thieffry<sup>2\*</sup>,  
13 Alejandra Medina-Rivera<sup>1\*</sup>.

14

15 1) Laboratorio Internacional de Investigación sobre el Genoma Humano, Universidad Nacional  
16 Autónoma de México, Juriquilla, México.

17 2) Computational Systems Biology team, Institut de Biologie de l'École normale supérieure,  
18 Inserm, CNRS, Université PSL, Paris, France.

19 3) Centro de Investigación en Dinámica Celular (IICBA), Universidad Autónoma del Estado de  
20 Morelos, Cuernavaca, México.

21 \*Corresponding author

22

23

## 24 Abstract (Up to 200 words)

25 Dendritic cells are the major specialized antigen-presenting cells, thereby connecting innate and  
26 adaptive immunity. Because of their role in establishing adaptive immunity, they have been used  
27 as targets for immunotherapy. Monocytes can differentiate into dendritic cells *in vitro* in the  
28 presence of colony-stimulating factor 2 (CSF2) and interleukin 4 (IL4), activating four signalling  
29 pathways (MAPK, JAK/STAT, NFkB, and PI3K). However, the transcriptional regulation  
30 responsible for dendritic cell differentiation from monocytes (moDCs) remains unknown. By  
31 curating scientific literature on moDCs differentiation, we established a preliminary logical model  
32 that helped us identify missing information for the activation of genes responsible for this  
33 differentiation, including missing targets for key transcription factors (TFs). Using ChIP-seq and  
34 RNA-seq data from the Blueprint consortium, we defined active and inactive promoters, together  
35 with differentially expressed genes in monocytes, moDCs, and macrophages (which correspond to  
36 an alternative cell fate). We then used this functional genomic information to predict novel targets  
37 for the identified TFs. We established a second logical model integrating this information, which  
38 enabled us to recapitulate the main established facts regarding moDCs differentiation.  
39 Prospectively, the resulting model should be useful to develop novel immunotherapies based on  
40 moDCs regulatory network.

## 41 Keywords

42 Dendritic cells, differentiation, Logical modeling, Regulatory networks

## 43 Introduction

44 Dendritic cells (DCs) are the main antigen-presenting cells (1), whose role is to activate the innate  
45 immune response, by presenting antigens to the naïve lymphocytes in order to initiate the immune  
46 response (2). Dendritic cells have been used in immunotherapies for their capacity to activate the  
47 adaptive immune response, in particular, dendritic cells derived from monocytes (moDCs) (3),  
48 as monocytes circulate in peripheral blood, they are easily accessible. Furthermore, there is an  
49 established protocol for moDCs differentiation (3).

50

51 The protocol to differentiate monocytes to moDCs consists in cultivating monocytes with colony-  
52 stimulating factor 2 (CSF2) and interleukin 4 (IL4) (4). When only IL-4 is used, monocytes are  
53 activated, while treatment with CSF2 results in their differentiation into macrophages. Only the  
54 combined stimuli results in DC differentiation, pointing to the importance of signalling interplay  
55 for the differentiation of moDCs. CSF2 signalling leads to the activation of NF $\kappa$ B, MAPK, PI3K,  
56 JAK2, and STAT5 (5,6). IL4 signalling activates the JAK/STAT pathway, while JAK1 activates  
57 STAT3 and JAK3 activates STAT6 (7). There are some well-known transcription factors (TFs)  
58 ultimately activated by CSF2 and IL4 signalling pathways, but presumably, only a fraction of the  
59 target genes participating in moDCs differentiation have been reported (6,8,9).

60

61 A good way to integrate multiple signalling pathways into a comprehensive regulatory network  
62 and check its coherence consists of developing a dynamical model (10). As most of the available  
63 data are qualitative, it is natural to use a qualitative approach to build such a model. Logical models  
64 are well suited to represent this qualitative data and have been proposed for various similar  
65 processes (11–13). This qualitative formalism relies on the construction of a regulatory graph,

66 whose nodes denote molecular components, while arcs denote (positive, negative, or dual)  
67 regulatory interactions. In the simplest cases, nodes are associated with Boolean variables, which  
68 take the values 0 or 1, denoting absence/inactivity or presence/activation, respectively (14).  
69 Logical models are usually derived based on a careful manual curation of relevant scientific  
70 literature; but they can also be enriched using other sources of information, such as high-  
71 throughput sequencing data (15). Logical models can integrate different kinds of molecular entities  
72 (genes, proteins, lncRNA, etc.) (15).

73

74 GINsim is a computational tool dedicated to the building and analysis of logical models, enabling  
75 the delineation of logical regulatory graphs, together with various dynamical analyses, through  
76 model simulations, but also with the support of efficient algorithms to identify the attractors (stable  
77 states and/or oscillatory behavior) of the system, for wild-type or mutant conditions (14). The  
78 resulting model can be further analysed using the CoLoMoTo tool suite, an interactive toolbox  
79 integrating several logical modeling software tools, with a uniform interface to perform  
80 simulations and other analyses, which are easy to share, and reproduce through the use of  
81 notebooks (16).

82

83 The aim of our study was to integrate all the information gathered from scientific literature and  
84 high-throughput data (RNA-seq and ChIP-seq) into a logical model of the regulatory network  
85 underlying moDCs differentiation. After iterative enhancement, our final model is able to properly  
86 recapitulate cell commitment for each of the initial conditions considered: (i) IL4 alone fosters  
87 monocyte activation, (ii) CSF2 alone fosters macrophage commitments, while (iii) CSF2 and IL4  
88 together foster moDC commitment.

## 89 Results

### 90 Information gathered from literature curation leads to a fragmentary model of monocytes 91 to dendritic cells differentiation

92 To better understand the regulatory network controlling moDCs differentiation, we analysed the  
93 scientific literature and integrated relevant information into a regulatory graph. In this process, we  
94 focused on monocyte to moDCs differentiation studies carried on human cells, in particular, on  
95 studies where CSF2 and IL4 were used in similar culture conditions. The resulting regulatory graph  
96 is shown in Figure 1.

**Figure 1**

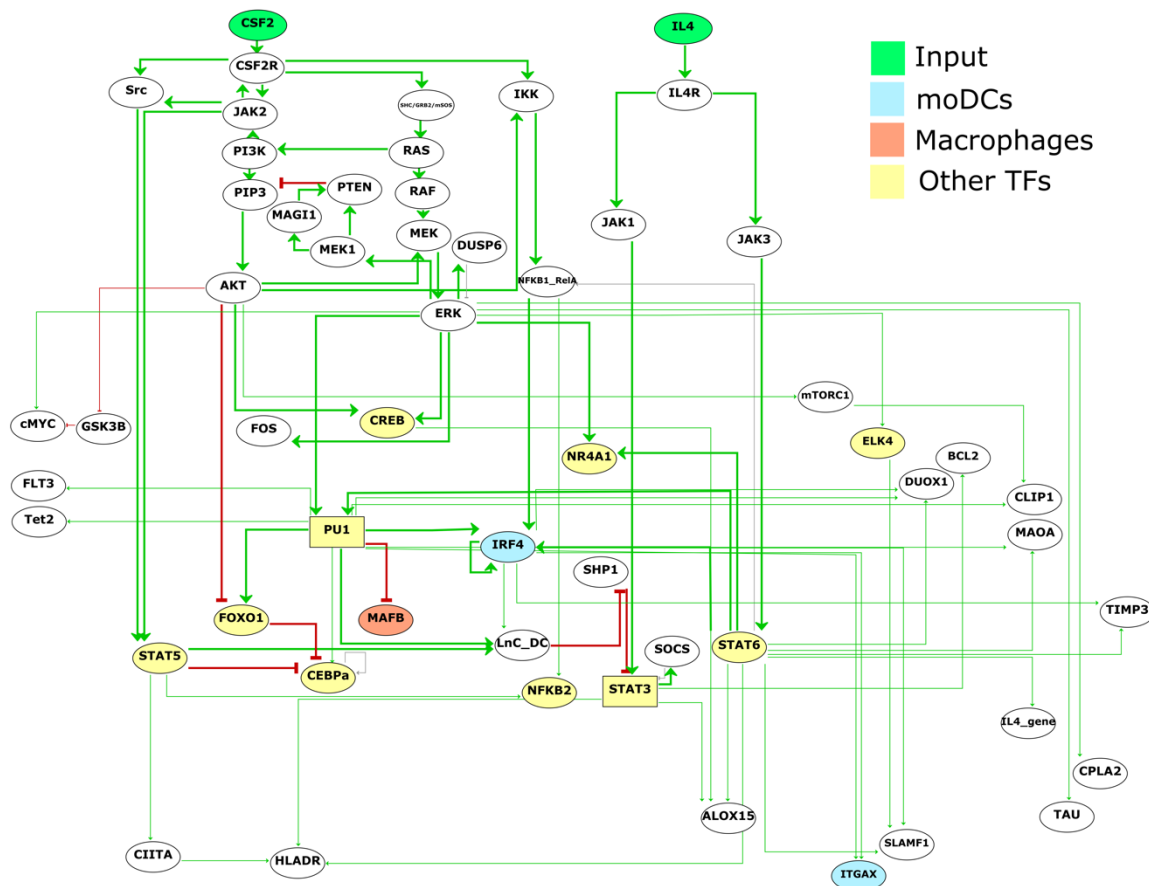

98 **Figure 1.** Regulatory graph controlling monocyte to moDCs differentiation, as derived from the  
99 scientific literature (last update “17april/2020”). The green nodes at the top represent the inputs  
100 (CSF2 and IL4), the yellow nodes denote transcription factors, the blue nodes denote moDCs  
101 specific genes, and orange nodes denote macrophage-specific genes. Nodes left in white  
102 correspond to components of generic signalling pathways. Green and red arcs denote positive and  
103 negative interactions, respectively.

104

105 Based on this first regulatory graph, we used GINsim to define logical rules (combining conditions  
106 on regulatory nodes with NOT, AND and OR Boolean operators), to compute the corresponding  
107 stable states and to perform simulations in order to determine the cellular phenotypes reached for  
108 each specific input condition. For this preliminary model, we found six stable states, but only one  
109 of them could be directly interpreted as a cellular phenotype (predendritic cells), while the other  
110 stable states did not recapitulate the typical signatures of activated monocytes or of macrophages.

111

112 Regarding the regulatory interactions between TFs and their target genes displayed in Figure 1,  
113 we observed that STAT6 has the highest number of interactions, while other TFs have only few  
114 interactions, such as STAT5, that only activates CIITA gene, or CREB that only activates  
115 ALOX15 gene. Furthermore, this regulatory graph contains very few specific moDCs markers.  
116 To complete this preliminary network, we decided to exploit epigenome and transcriptome data to  
117 infer novel regulatory interactions and integrate them into our logical model (a proof of concept  
118 of this approach can be found in Collombet *et. al.* 2016 (15)).

119

120 **Epigenome annotations help to unravel relevant transcription factor regulatory interactions**

121 In order to complete our model of the regulatory network controlling the differentiation of  
122 monocytes into moDCs, we included the TFs known to be activated by CSF2 and IL4 signals in  
123 moDCs, as well as established monocytes markers. Moreover, we included information regarding  
124 the differentiation of monocytes into macrophages, which occurs when monocytes are treated with  
125 CSF2 alone (17). In short, we (i) used monocytes, moDCs, and macrophage epigenome data to  
126 define chromatin states, (ii) defined genomic regions likely to be involved in the regulation of the  
127 genes of the model, and (iii) searched for putative TFs binding sites in these regions.

128 We analysed ChIP-seq data from the Blueprint consortium for six histone marks (H3K4me1,  
129 H3K4me3, H3K27ac, H3K36me3, H3K9me3 and H3K27me3) in monocytes, moDCs, and  
130 macrophages derived from monocytes. We then used ChromHMM (18) to annotate the epigenome  
131 in each cell type based on these data. The resulting states (segments) were classified as  
132 Quiescent/low signal, Polycomb repressed, Poised regulation, Active TSS, Active promoter,  
133 Primed enhancer, Active gene/enhancer, Low transcription, TSS repressed and Strong  
134 transcription (Figure 2a). As expected, it is possible to visualize clear differences in the epigenome  
135 of moDCs and monocytes when exploring genes with specific cell expression in a genome  
136 browser, for example, the gene IRF4, a TF that mediates the differentiation of moDCs, is only  
137 active in moDCs while it is poised on macrophages and monocytes (Figure 2b).

138

139

## Figure 2

(a)

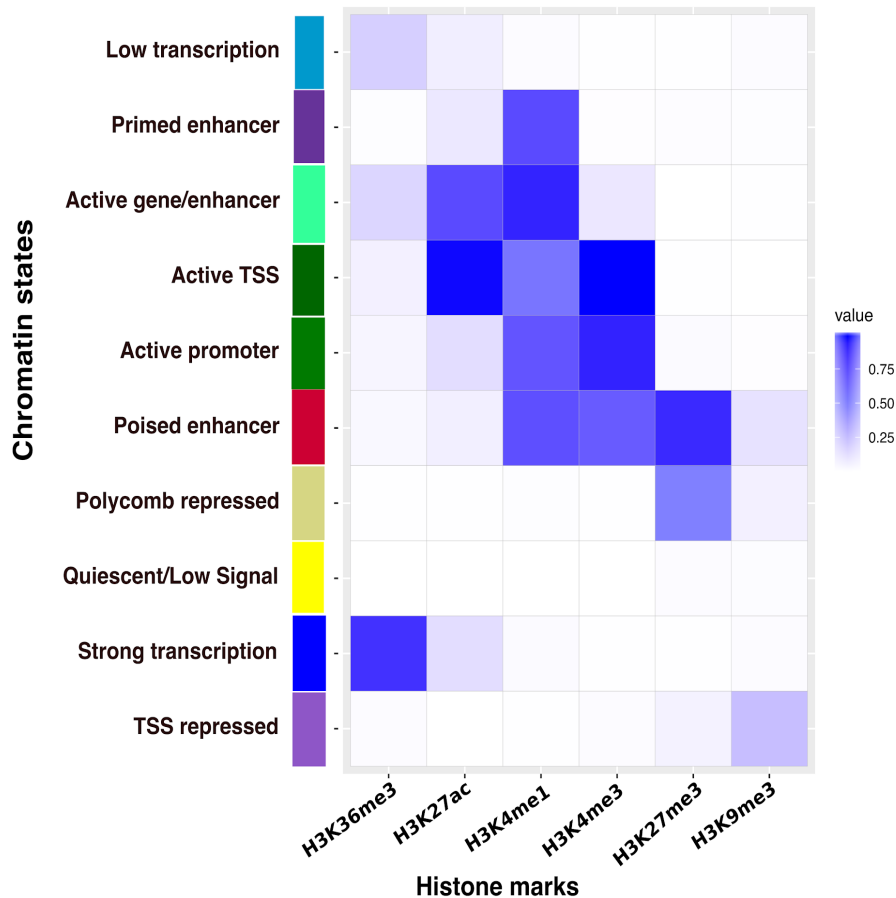

(b)

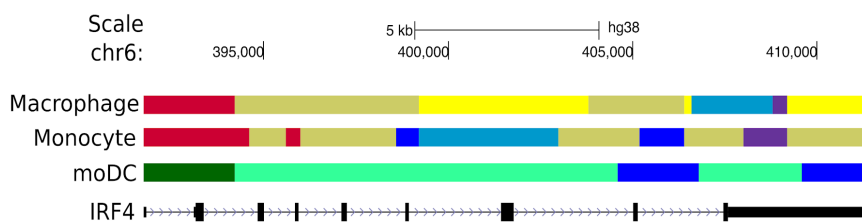

140

141 **Figure 2.** Epigenomic annotations of monocytes, moDCs, and macrophages. (a) Heatmap showing

142 the histone mark enrichment in each of the states determined with ChromHMM. (b) IRF4 genomic

143 region visualized in the UCSC browser, each row of segmentation corresponds to a specific cell

144 type. Segmentation results from ChromHMM analysis, each color represents a state according to

145 the color code used in the heatmap. State annotation was manually done based on biological

146 knowledge. moDCs are the only cell type with the active gene marks (in green).

147



148 We selected the epigenome annotations regions with promoter-associated functions: Active TSS,  
149 Repressed TSS, Active gene/enhancer, and Poised regulation. These regulatory regions were then  
150 used to predict binding sites for the fourteen TFs activated by CSF2 and IL4 pathways (Figure 1)  
151 using the position-weight matrices collected in the Jaspar database (19) with the pattern-matching  
152 tool *matrix-scan* (20) from the RSAT suite (21). This led us to define novel regulatory interactions  
153 targeting specific gene markers for moDCs, monocytes, and macrophages (Table 1), thereby  
154 enabling us to complete the regulatory network controlling monocytes to moDCs differentiation.  
155

156 **Table1. Cell type-specific gene markers selected to be added into the model.** Based on the  
157 epigenome analysis we identified relevant regulatory interactions that helped select candidate  
158 genes to be added to the model.

| Cell-type | Gene             |
|-----------|------------------|
| moDCs     | TLR8             |
| moDCs     | TLR7             |
| moDCs     | TLR6             |
| moDCs     | TLR4             |
| moDCs     | TLR3             |
| moDCs     | NCOR2            |
| moDCs     | DEC205<br>(LY75) |
| moDCs     | DCIR<br>(CLEC4A) |
| moDCs     | CD83             |
| moDCs     | CD48             |
| moDCs     | CD226            |
| moDCs     | CD209            |
| moDCs     | CD1C             |
| moDCs     | CD1B             |

|            |                  |
|------------|------------------|
| moDCs      | CD1A             |
| moDCs      | CD141<br>(THBD)  |
| moDCs      | ITGAX<br>(CD11C) |
| moDCs      | CCL22            |
| moDCs      | CCL2             |
| Monocyte   | CD14             |
| Monocyte   | SELL             |
| Macrophage | CD163            |
| Macrophage | CCDC151          |
| Macrophage | MERTK            |
| Macrophage | CD206            |

159

160 For thirteen out of 20 genes related to moDCs phenotype, we found putative binding sites for the  
161 TF IRF4 (Figure 3a), corroborating a central role for IRF4 in the moDCs differentiation. In  
162 particular, we predicted that IRF4 directly regulates TLR genes (TLR3, 4 and 7), which play a  
163 crucial role in antigen recognition and are thus relevant for moDCs function. Furthermore, we  
164 predicted that TLR6 and TLR8 are regulated by STAT6, another essential TF in moDCs (6). In  
165 addition, we predicted that the genes encoding for the external proteins CD1A, CD1B, and CD1C  
166 are regulated by IRF4, as well as by other TFs (PU.1, PRDM1, NR4A1, CEBPA) related to moDC  
167 differentiation. Furthermore, we predicted that the gene coding for CD48, a costimulatory  
168 molecule involved in T cell activation, is regulated by PU.1, which is known to participate in the  
169 differentiation of STEM cell progenitors into leukocytes at different stages (22). We also looked  
170 for regulatory interactions between the identified TFs. Additionally, we validated interactions of  
171 PU.1 with CEBPA, IRF4, and IRF8. We also identified that AHR is regulating IRF4, MAFB, and  
172 PRDM1, which represent interesting candidates to assess experimentally. Figure 3b summarizes

173 the regulatory interactions that compose our final logical model, where colored squares emphasize  
 174 novel regulations, and asterisks denote interactions already described in the literature.

**Figure 3**

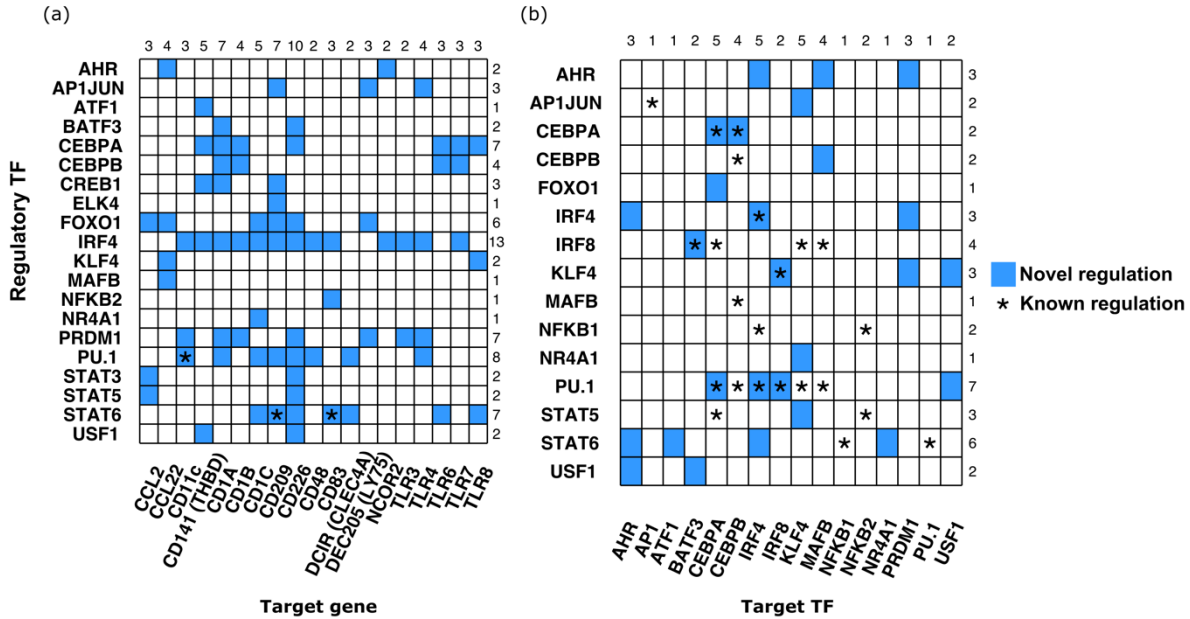

175  
 176 **Figure 3.** Predicted transcriptional regulatory interactions by TFs activated through CSF2 and IL4  
 177 signalling cascades. Each TF binding motif was used to search for putative binding sites in selected  
 178 regulatory regions (based on chromatin state annotations) of specific gene or TF. (a) The y-axis  
 179 shows the list of regulatory TFs and the x-axis shows the moDCs specific target genes. (b) The y-  
 180 axis shows the list of regulatory TFs and the x-axis shows target TFs, in order to identify new  
 181 regulatory interactions between TFs. Turquoise colored squares show predicted binding sites for  
 182 the specified TF. Asterisks mark the binding sites for target genes or trans-regulation for target TF  
 183 that have been already reported. Numbers at the end of each row correspond to the numbers of  
 184 genes with regulatory interactions for each TF. Numbers at the top of every column correspond to  
 185 the numbers of TF regulating each target gene.

186

### 187 **Integration of new relevant regulatory interactions improves model accuracy**

188 We integrated the selected gene markers for each cell type with the predicted regulatory TFs into  
 189 our model by adding the discovered regulatory interactions summarized in Figure 3. Using the

190 new version of the model together with relevant Boolean rules, we set out to compute its stable  
 191 states, which much better recapitulated the main cell fates compared to our first model (Figure 4a).  
 192 Our revised model is characterised by four stable states. The first stable state corresponds to cell-  
 193 death, which is the expected outcome for monocytes without cytokine stimulation. The second  
 194 state, with IL4 ON, corresponds to monocyte signature (KLF4, SELL, and CD14 genes). The third  
 195 stable state, with CSF2 ON, corresponds to monocytes that display a macrophage signature  
 196 (MAFB, CEBPB, CD163, and CD206 genes). Finally, the last stable state, with CSF2 and IL4 ON,  
 197 displays the moDCs signature (*i.e.* with IRF4, STAT6, CD1A, and CD209 all ON) (Figure 4b).  
 198 Once we performed the analysis of stable states computation using our model, we validated that  
 199 the PI3K signalling remained inhibited in order to reach moDCs commitment, this behavior was  
 200 described by Van de Laar *et al.* 2012 (23).

**Figure 4**

(a)

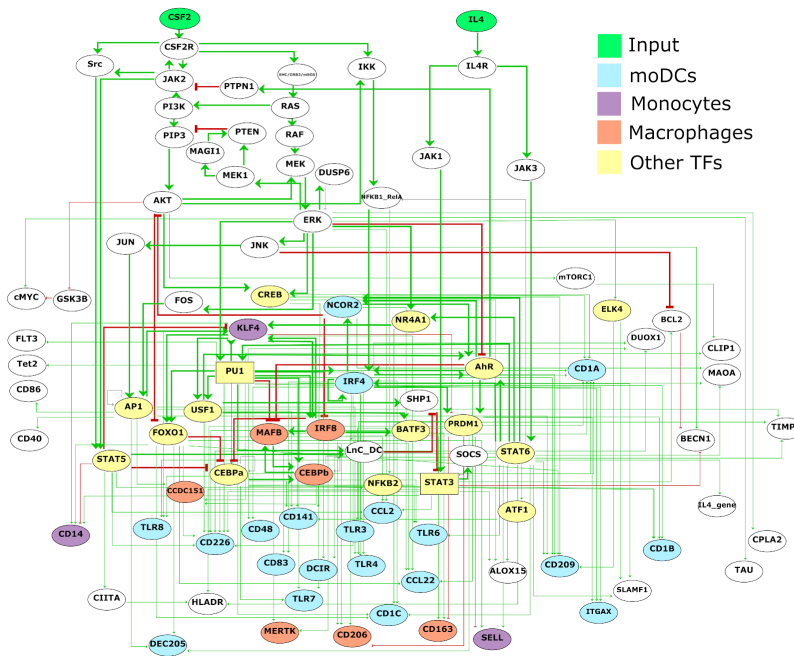

(b)

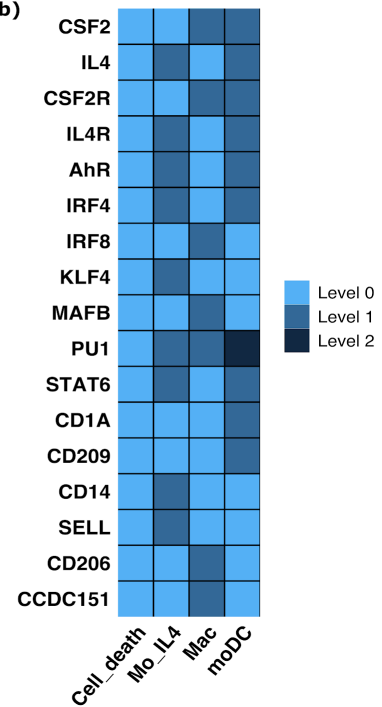

201

202 **Figure 4.** Logical model of monocytes to dendritic cells differentiation *in vitro*. **(a)** The green  
203 nodes at the top represent the inputs (CSF2 and IL4), the yellow nodes denote other TFs, blue  
204 nodes correspond to moDC specific genes, orange nodes to macrophage-specific genes, and purple  
205 nodes to monocyte specific genes. Green and red arcs denote positive and negative interactions,  
206 respectively. **(b)** Stables states of selected nodes (signature for each cell type), with the mention  
207 of the corresponding cell type. The first column corresponds to the final outcome in the absence  
208 of both IL4 and CSF2, *i.e.* cell-death of the monocytes. The second column corresponds to the  
209 stimulation of monocytes by IL4. The third column corresponds to the macrophage outcome, in  
210 the presence of the sole CSF2. Finally, the fourth column corresponds to moDCs commitment, in  
211 the presence of both IL4 and CSF2, where STAT3 reaches the level 2 in the presence of the long  
212 non-coding RNA LnC-DC, and PU.1 reaches the level 2, which is required to turn-off MAFB  
213 during moDCs commitment. SuppFig1 displays the complete set of nodes.

214

215 We used gene expression information to validate the different cell commitment expression  
216 signatures. To do that, we analysed RNA-seq data from monocytes, moDCs, and macrophages.  
217 Figure 5 displays the differential expression of the genes included in the model. Interestingly, we  
218 found two main clusters of genes highly expressed in moDCs, but down regulated in macrophages.  
219 These moDCs differentially express clusters of genes, including STAT3, STAT6, CEBPA, IRF4,  
220 TFs that participate in moDCs differentiation, also including CD206, MAOA, SLAMF1, that are  
221 specific markers for moDCs. Additionally, monocytes show highly expressed genes, like KLF4,  
222 IRF8, SELL, and CD14.

223

224 After integrating epigenome and transcriptome data into the model, we performed further  
225 simulations using the CoLoMoTo toolbox, with the purpose of recapitulating documented cellular  
226 commitment experiments.

**Figure 5**

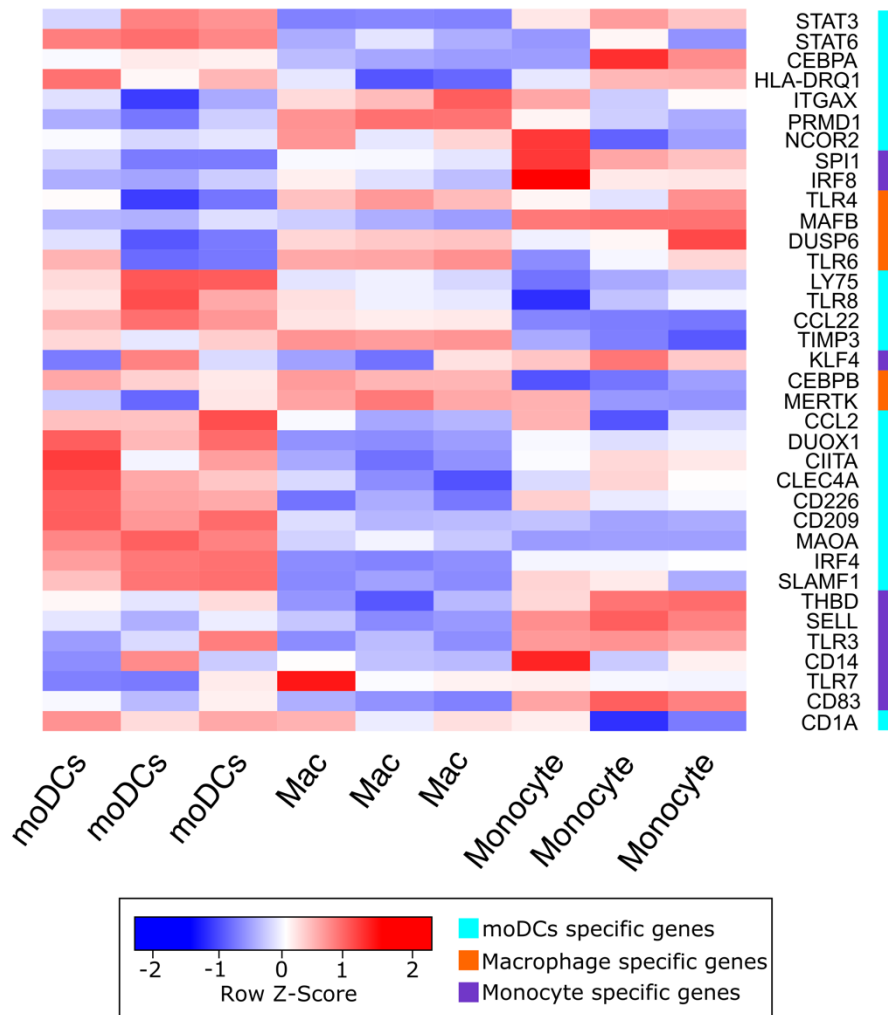

227  
228 **Figure 5.** Clustered heatmap showing differentially expressed genes between cell types. The first  
229 three columns are moDCs, the next three columns are macrophages, and the last three columns are  
230 monocytes (columns represent biological replicates). The Z-score indicates the level of differential  
231 expression gene by gene bases. The colored column at the right represents specific gene markers

232 per cell type, in blue for moDCs, orange for macrophages, and purple for monocytes. The heatmap  
233 is clustered by differential expression.

234

### 235 **Model simulations correctly estimate cellular commitment to differentiation**

236 We imported our model into the CoLoMoTo Interactive Notebook, a digital notebook that enables  
237 integrated complementary analyses software (with PINT, BioLQM, and MaBOSS) and facilitates  
238 reproducibility (24). The notebook is available as supplementary material. We used the tool Pint  
239 (25) to assess nine single gene mutants (IRF4, STAT6, PU.1, IRF8, MAFB, NCOR2, AHR, JAK3,  
240 CEBPB) that have been reported in the literature to affect the differentiation process. We were  
241 able to replicate the behavior of each mutant (perturbations) with our model. Table 2 shows the  
242 summary of the results obtained for these perturbations, while Figure 6 shows the behavior of each  
243 node for each perturbation at the corresponding stable states.

244

245 **Table 2. Perturbations tested in the model of monocyte to moDCs differentiation.**

| <b>Protein</b> | <b>Function</b>           | <b>Phenotype described</b>                                                                                                                                             | <b>Perturbation simulated</b> | <b>Model phenotype</b>                                                             |
|----------------|---------------------------|------------------------------------------------------------------------------------------------------------------------------------------------------------------------|-------------------------------|------------------------------------------------------------------------------------|
| <b>IRF4</b>    | Transcription factor      | Monocytes were infected using lentiviral vectors containing shRNA against IRF4, silenced IRF4 induced a dramatic reduction of moDCs (9).                               | Loss of function              | Lack of most of moDCs specific markers                                             |
| <b>STAT6</b>   | Transcription factor      | The ectopic expression of STAT6 in monocytes, resulted in increased levels of the DC-specific marker DC-sign, following CSF2 stimulation and without IL4 (6).          | Gain of function              | STAT6 is almost sufficient to archive moDC differentiation                         |
| <b>PU.1</b>    | Transcription factor      | Inducible constructions of PU.1 and MAFB were used to infected monocytes. In cells with PU.1 induced DCs, MafB differentiated macrophages (26).                        | Loss of function              | Abolish moDCs and macrophage phenotype commitment                                  |
| <b>IRF8</b>    | Transcription factor      | Introduction of KLF4 into an Irf8 <sup>-/-</sup> myeloid progenitor cell line induced a subset of IRF8 target genes and caused partial monocyte differentiation (27).  | Loss of function              | Abolish KLF4 expression, and the entire macrophage differentiation                 |
| <b>MAFB</b>    | Transcription factor      | Silencing of MAFB resulted in a strong decrease in mo-Macs and an increase in mo-DC differentiation (26).                                                              | Loss of function              | moDCs differentiation is normal, Macrophage differentiation is abolished           |
| <b>NCOR2</b>   | Transcriptional regulator | NCOR2 silencing resulted in 1,834 variable genes that correspond with IL4 signature genes (28).                                                                        | Loss of function              | Lack of moDCs specific markers                                                     |
| <b>AHR</b>     | Transcription factor      | AHR silencing reduced mo-DC differentiation while slightly increasing mo-Mac (9).                                                                                      | Loss of function              | Lack of every moDCs specific markers, macrophage differentiation is normal         |
| <b>JAK3</b>    | Tyrosine-protein kinase   | STAT6 phosphorylation disappeared following JAK3 inhibition. In the case of MACs, we did not observe STAT6 phosphorylation, given the lack of stimulation of JAK3 (6). | Loss of function              | Macrophage phenotype with CSF2 and IL4. Macrophage differentiation is not affected |
| <b>CEBPB</b>   | Transcription factor      | In the absence of CEBPb in monocytes CEBPb-KO, only a very low amount (5%) of this macrophage-like morphology was seen, and most of the cells stayed round (29).       | Loss of function              | Lack of some specific macrophage markers                                           |



## Figure 6

Clustered heatmap of each stable states found for each perturbation

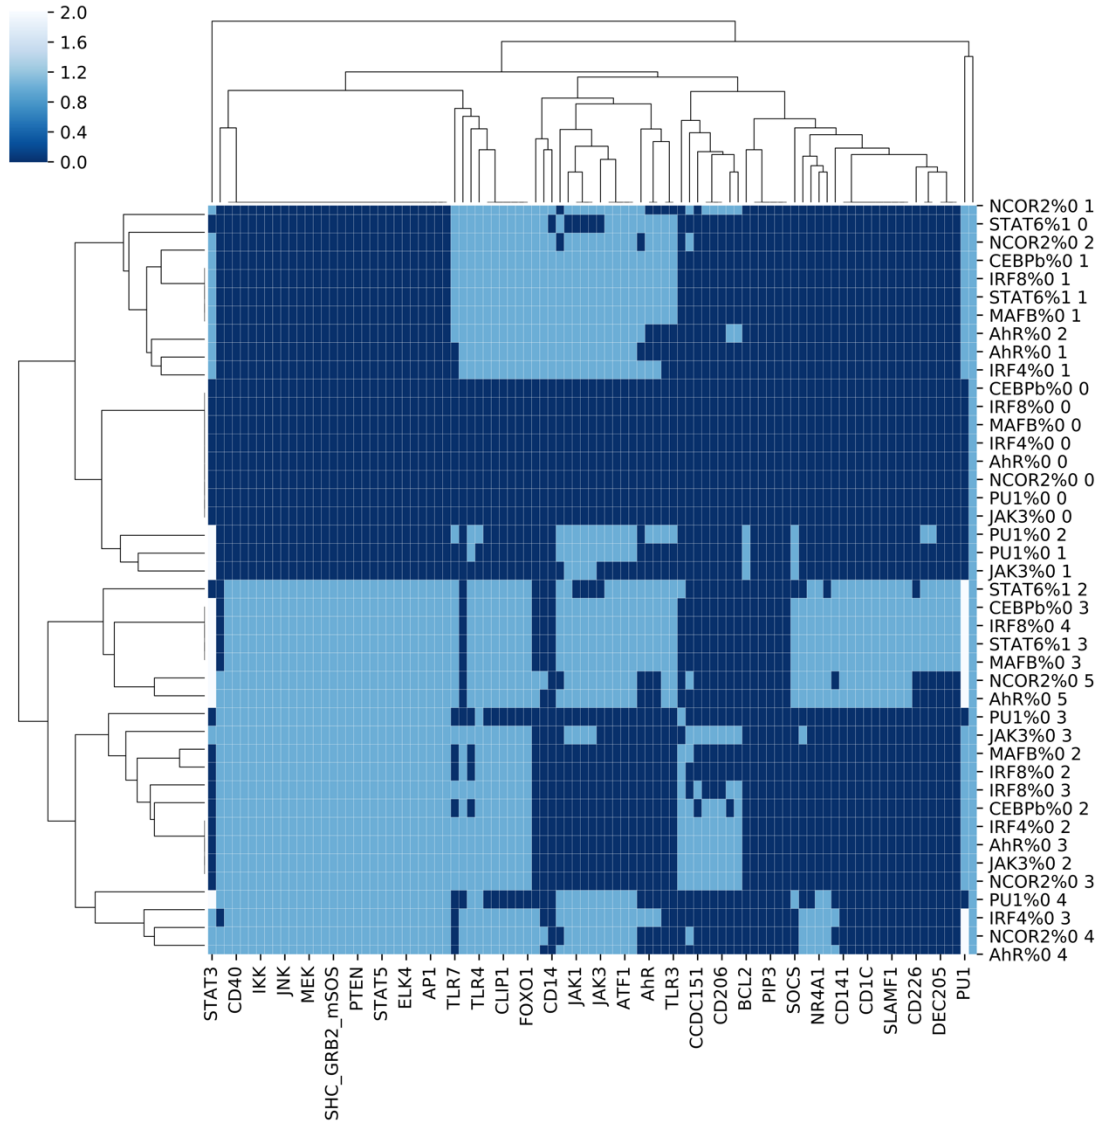

247

248 **Figure 6.** Clustered heatmap of the stable states obtained for all the perturbations considered. Each

249 row represents one perturbation and one corresponding stable state. For example, NCOR2%0 1

250 denotes a knockout of NCOR2 and corresponds to the stable state 1 obtained for this condition.

251 Every column represents one of the 95 nodes of the logical model.

252 We used the tool BioLQM to validate the reachability of each cell type commitment according to  
253 each stimulus combination. In order to verify the percentage of the final cell fate with the different  
254 initial stimulus, we used the stochastic Boolean simulation tool MaBoSS to estimate the  
255 probabilities to reach alternative states, where the final stable states represent alternative cell fate  
256 commitment (30).

257 From the literature, we know that CSF2 and ILF4 presence commits cells to differentiate to  
258 moDCs. Using MaBoSS, we tested cell commitment with the combination of CSF2 and IL4 ON  
259 at the initial state. This simulation showed that 100% of cells then commit to become moDCs  
260 (Figure 7c). For IL4 ON but not CSF2, 100% of the cells differentiate into stimulated monocytes,  
261 with the corresponding gene markers ON (figure 7a). For CSF2 ON but not IL4, 100% of the cells  
262 differentiated to macrophages, as expected (Figure 7b). In figure 7, we can clearly distinguish the  
263 three stable states corresponding to monocytes, moDCs, and macrophages, respectively.

**Figure 7**

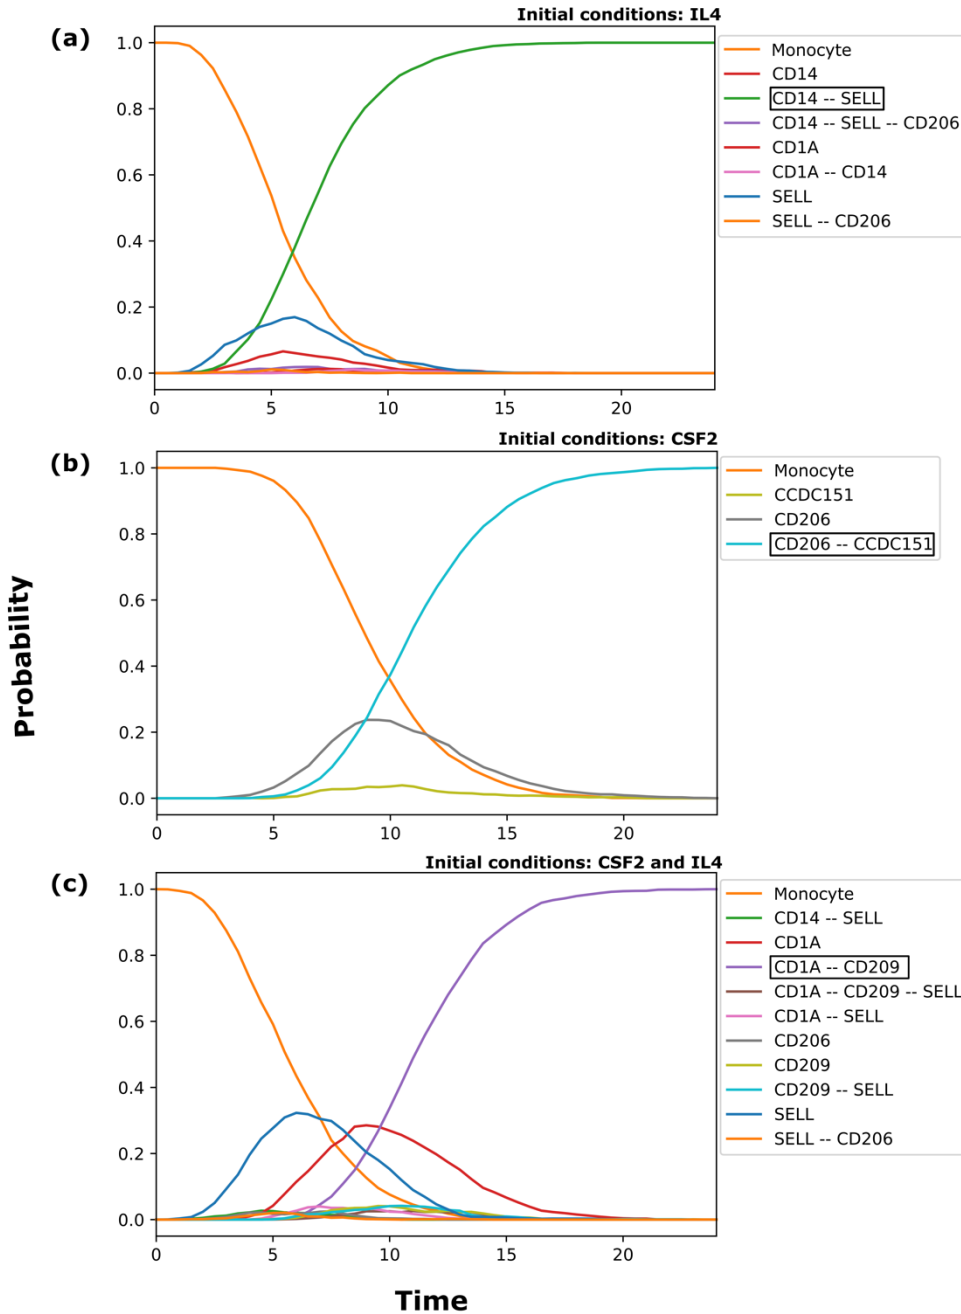

264

265 **Figure 7. Stochastic simulations with MaBoSS trajectories correctly recapitulate cellular**  
 266 **commitment. The x-axis shows the time, the y-axis shows the probability to reach every final**  
 267 **commitment. Highlighted in a rectangle is the final cellular commitment per stimulus. (a) IL4 ON**  
 268 **gives rise to 100% differentiated cells into stimulated monocytes. (b) CSF2 ON gives rise to 100%**

269 of the cells differentiated into macrophages. (c) With both CSF2 and IL4 ON 100% of cells commit  
270 to the moDC phenotype.

271

## 272 Discussion

273 The construction of logical models traditionally relies on manual curation of the literature of a  
274 biological system of interest. In this work, we further took advantage of public ChIP-seq and RNA-  
275 seq data from the Blueprint consortium (31) to delineate in more detail the network driving the  
276 differentiation of monocytes into moDCs. We were able to fill various gaps in this regulatory  
277 network, which allowed us to reach a better understanding of this particular differentiation process.  
278 In the process, we predicted a series of novel interactions, validated *in silico* through our  
279 simulations, and amenable to further experimental tests.

280

281 In particular, we delineated a series of target genes presumably important for the differentiation of  
282 monocytes into moDCs. Some TFs are already well known, such as IRF4, AHR, STAT6, and PU.1  
283 (6,9,32). In our analysis, we were able to recapitulate key features regarding the expression of the  
284 corresponding genes, such as a high expression of IRF4 and STAT6 genes in moDCs. We further  
285 validated the results obtained by Vento et al 2016 (6), in which STAT6 is required for moDCs  
286 differentiation; according to our model, STAT6 is indeed required for moDCs differentiation, but  
287 not for macrophage commitment.

288 We were also able to unravel TFs not previously reported as relevant in this process, such as  
289 FOXO1, C/EBP $\alpha$ , AP1, and PRDM1, tentatively regulating specific moDCs genes. We predict  
290 that FOXO1 regulates at least six moDCs genes, while C/EBP $\alpha$  regulates at least seven of them.

291 Particularly, AP1 regulates TLR4, DEC205 (LY75), and CD209 (DC-SING), which are relevant  
292 for an antigen-presenting cell. CREB1 is also participating in the regulation of moDC genes,  
293 through the activation of CD141 y CD1A. We also predict for the first time that NR4A1 could  
294 regulate CD1C, a protein found at the surface of moDCs.

295

296 We further reviewed data recently published on the predicted TF-gene interaction considered in  
297 our model, and we found that some of these interactions have been recently experimentally  
298 confirmed. In particular, the regulation for the ITGAX gene was shown to be regulated by PU.1  
299 and IRF4 (32), as predicted by our epigenomic analysis.

300

301 This study represents the first effort to integrate the current knowledge on monocytes to moDCs  
302 differentiation *in vitro* and should foster our understanding of this process. Additionally, we  
303 unraveled novel TFs and regulatory links potentially involved in this differentiation process.

304

## 305 Material and methods

### 306 GINsim implementation and simulations.

307 Using the software GINsim version 3.0 (14), we integrated the previously described signalling  
308 pathways that are activated when monocytes are cultured with CSF2 and IL4 (studies reviews are  
309 inside GINsim model as annotations, and in the SuppFile1). We also performed a review of the  
310 available literature related to the process of monocyte to moDCs differentiation. The logical model  
311 was built using GINsim (33), where nodes represent genes or proteins, and edges represent the  
312 interactions between them, these interactions can be negative (red arrow) or positive (green arrow).

313 In general, each node can take two values, zero or one, but in special cases, activation (ON)  
314 requires to consider different qualitative levels of activation (*e.g.*: STAT3 expression is activated  
315 by JAK1, but the presence of LncDC leads to a further increase of STAT3 expression). For these  
316 special cases, it is possible to use multilevel nodes, *e.g.* ternary variables enabling an additional  
317 level of activation (hence taking the values 0, 1, and 2). Logical rules are associated with each  
318 component of the network, combining literals (*i.e.* regulatory variables with specific values) with  
319 the classical Boolean operators AND (&), OR (|) and NOT(!), thereby defining in which conditions  
320 each of these components can be activated or shut down.

321

### 322 **ChIP-seq data analysis.**

323 Raw fastq files from ChIP-seq experiments were retrieved from the Blueprint Consortium (31)  
324 data access portal (<http://dcc.blueprint-epigenome.eu/#/datasets>) with dataset identifiers  
325 EGAD00001001552, EGAD00001002484, EGAD00001002485, EGAD00001001576,  
326 EGAD00001002504. We processed six histone marks data (H3K4me1, H3K4me3, H3K27ac,  
327 H3K36me3, H3K9me3, and H3K27me3) with two biological replicates from human monocytes,  
328 macrophages, and moDCs. We performed quality control of read sequences with FastQC/0.11.3  
329 tool (34), then we used Trimmomatic/0.33 (35) to improve quality reads before mapping them  
330 with bowtie2-2.2.6 (36) to the human hg38 reference genome. Second quality control is required  
331 after alignment, for which we used ENCODE QC, which consists of three major tests: NRF (non-  
332 redundant fraction), PBC1 (PCR Bottleneck coefficient 1), and PBC2 (PCR Bottleneck coefficient  
333 2) (37). IDR analysis (37) was performed to replicate control.

334

### 335 **Chromatin states definition.**

336 We used one set of the six histone marks (H3K4me1, H3K4me3, H3K27ac, H3K36me3,  
337 H3K9me3, and H3K27me3) ChIP-seq data for each cell type (monocytes, macrophages, and  
338 moDCs) and their respective input control. Chromatin states were defined using ChromHMM (18)  
339 version 1.12 (38) with the recommended parameters (BinarizeBed -b 200, assembly hg38), and  
340 specifying 10 states. In order to define the description for the states, we used the probability of  
341 appearance of different marks in every state (*e.g.* H3K27ac-Enhancers, H3Kme1-Enhancers,  
342 H3K4me3-Promoters, H3K27me3-Repressive, H3K9me3-Repressive, H3K36me3-Transcribed  
343 (39), and then we looked into the enrichment of the states for several genome annotations  
344 (CpGIsland, RefSeqExon, RefSeqGene, RefSeqTES, RefSeqTSS, and RefSeq2kb). Integrating  
345 this information, we were able to manually assign a functional description to each state. Once we  
346 described every state, we focused on Active TSS, Repressed TSS, Active gene/enhancer, and  
347 Poised regulation regions to look for regulatory interactions between TFs and target genes. For  
348 poised regulation, it is well known that regions go from poised to active regions when cells are  
349 under differentiation. Additionally, we took the whole segment for each state selected result from  
350 ChromHMM.

351

### 352 **Search for TFBS using matrix-scan**

353 From manual curation of literature, we identified 22 TFs that participate after monocyte  
354 stimulation leading to the differentiation of macrophages or moDCs. We retrieved one PSSM  
355 (Position-Specific Scoring Matrix) for each of the 22 TFs (SuppTable1) from the JASPAR2018  
356 database human collection (19). We performed pattern-matching searches for TF motif instances  
357 using the 22 PSSMs in the selected chromatin regions (Active TSS, Repressed TSS, Active  
358 gene/enhancer, and Poised regulation) from ChromHMM results. For this task we used the tool

359 *matrix-scan* (20) from the RSAT suite (21) with the following main parameters: background model  
360 of Markov order 1 and stringent thresholds of p-value  $\leq 10^{-5}$  and score 1 (-markov 1 -lth score 1  
361 -uth pval 1e-5).

362

### 363 **RNA-seq analyses**

364 Raw fastq files from RNA-seq experiments were retrieved from the Blueprint Consortium (31)  
365 data access portal (<http://dcc.blueprint-epigenome.eu/#/datasets>) with dataset identifiers:  
366 EGAD00001002308, EGAD00001001506, EGAD00001002526, EGAD00001002507, and  
367 EGAD00001001582. For this analysis, we used the methods described in Law et al 2016 (40). In  
368 brief, that is quality control with FastQC/0.11.3 (41), pseudo-alignment and count determination  
369 with Kallisto 0.43.1 (42) using the release-90 from Ensembl ([ftp://ftp.ensembl.org/pub/release-](ftp://ftp.ensembl.org/pub/release-90/fasta/homo_sapiens/cdna/Homo_sapiens.GRCh38.cdna.all.fa.gz)  
370 [90/fasta/homo\\_sapiens/cdna/Homo\\_sapiens.GRCh38.cdna.all.fa.gz](http://ftp.ensembl.org/pub/release-90/fasta/homo_sapiens/cdna/Homo_sapiens.GRCh38.cdna.all.fa.gz)) to create our index with the  
371 following command: `kallisto index -i index_kallisto_hsap_90_cdna --make-unique`  
372 `Homo_sapiens.GRCh38.cdna.all.fa.gz`. Counts were assigned to genes using Tximport 1.14.0 (43),  
373 and were processed from raw-scale to counts per million (CPM), then they were transformed to  
374 log-CPM. Genes below 1 of expression were removed. Then we normalized raw library sizes using  
375 the *calcNormFactors* function from edgeR library in R. Afterwards, we performed a differential  
376 gene expression analysis with edgeR 3.28.0 (44). Finally, we used heatmap.2 from the gplots  
377 library to plot the genes found in our model (Figure 5).

378

### 379 **CoLoMoTo analysis**

380 In order to assure reproducibility, we used the CoLoMoTo toolbox(16) that integrates several  
381 logical modeling tools, including GINsim, bioLQM, Pint, and MaBoSS. We used GINsim to



382 compute the stable states, and bioLQM to identify trap spaces approximating cyclic attractors. The  
383 computation of mean stochastic trajectories was performed using MaBoSS (30). The GINsim  
384 model and the CoLoMoTo notebook are available at  
385 [https://github.com/karenunez/moDC\\_model\\_differentiation](https://github.com/karenunez/moDC_model_differentiation).

386

### 387 **Figures generation**

388 Figure 1, and 4A were generated with the GINsim software. The plots in Figures 2A, 3A, 3B, and  
389 4B were done using the ggplot2 library from R. Figures 6, and 7 are from the CoLoMoTo notebook  
390 constructed in this study.

## 391 **Supplemental material**

392 Supplementary files are available at [https://github.com/karenunez/moDC\\_model\\_differentiation](https://github.com/karenunez/moDC_model_differentiation).

393 SuppFile1. Model\_annotation.doc

394 SuppFile2. Mo\_Mac\_moDCs\_ChromHMM\_summary.html

395 SuppFile3. moDC\_E7\_ActiveGeneEnhancer.bed

396 SuppTable1. TFs\_JASPARID\_matrixes.xlsx

397 SuppFigure1.StableStates\_95nodes.png

398

## 399 **Acknowledgments**

400 Karen Julia Nuñez Reza is a doctoral student from Programa de Doctorado en Ciencias  
401 Biomédicas, Universidad Nacional Autónoma de México (UNAM) and received fellowship

402 CVU/Becario: 634764/331823 from CONACYT, México. This work received support from Luis  
403 Aguilar, Alejandro Leon and Jair García of the Laboratorio Nacional de Visualización Científica  
404 Avanzada. We thank Carina Uribe Díaz and Alejandra Castillo Carbajal for their technical support.  
405 We want to thank Marc Dalod and Thien Phong Vu Manh for your valuable comments on our  
406 work.  
407

## 408 Funding

409 This work was supported by CONACYT grants 269449 and 1690; Programa de Apoyo a Proyectos  
410 de Investigación e Innovación Tecnológica – Universidad Nacional Autónoma de México  
411 (PAPIIT-UNAM) grant [IA206517-IA201119]; M.T.-C., A.M.-R, A.S. and D.T. further  
412 acknowledge SEP-CONACYT-ECOS-ANUIES (291235) support. MTC is supported by Institut  
413 Universitaire de France.

## 414 415 Conflict of Interest Statement

416 The authors declare that the research was conducted in the absence of any commercial or financial  
417 relationships that could be construed as a potential conflict of interest.

418

## 419 Authors' contributions

420 K.J.N.-R. carried out the manual literature curation, performed the ChIP-seq and RNA-seq data  
421 analysis, participated in the construction of the two model versions, notebook implementation,

422 study design, and drafted the manuscript; A.N. participated in the construction of the two model  
423 versions, notebook implementation, and drafted the manuscript; A.S.-J. participated in the manual  
424 literature curation, and drafted the manuscript; A.V.L.-A. participated in the manual literature  
425 curation, and drafted the manuscript; A.S. participated in the design of the study, and drafted the  
426 manuscript; M.T.C. mentored the ChIP-seq, ChromHMM, and matrix-scan analysis, participated  
427 in the design of the study and drafted the manuscript; D.T participated in the construction of the  
428 two model versions, notebook implementation, study design, and drafted the manuscript; A.M.-R.  
429 mentored the ChIP-seq, ChromHMM, and matrix-scan analysis, participated in the design of the  
430 study, and drafted the manuscript.

## 431 References

- 432 1. Banchereau J, Steinman RM. Dendritic cells and the control of immunity. *Nature* [Internet]. 1998  
433 Mar 19;392(6673):245–52. Available from: <http://dx.doi.org/10.1038/32588>
- 434 2. Segura E. Review of Mouse and Human Dendritic Cell Subsets. *Methods Mol Biol* [Internet].  
435 2016;1423:3–15. Available from: [http://dx.doi.org/10.1007/978-1-4939-3606-9\\_1](http://dx.doi.org/10.1007/978-1-4939-3606-9_1)
- 436 3. Wculek SK, Cueto FJ, Mujal AM, Melero I, Krummel MF, Sancho D. Dendritic cells in cancer  
437 immunology and immunotherapy. *Nat Rev Immunol* [Internet]. 2019 Aug 29; Available from:  
438 <http://dx.doi.org/10.1038/s41577-019-0210-z>
- 439 4. León B, López-Bravo M, Ardavin C. Monocyte-derived dendritic cells. *Semin Immunol* [Internet].  
440 2005 Aug;17(4):313–8. Available from: <http://dx.doi.org/10.1016/j.smim.2005.05.013>
- 441 5. Laar LVD, Coffey PJ, Woltman AM. Review article Regulation of dendritic cell development by  
442 GM-CSF : molecular control and implications for immune homeostasis and therapy.  
443 2017;119(15):3383–94. Available from: <http://dx.doi.org/10.1182/blood-2011-11-370130>.The
- 444 6. Vento-tormo R, Company C, Rodríguez-ubreva J, Rica LD, Urquiza JM, Javierre BM, et al. IL-4  
445 orchestrates STAT6-mediated DNA demethylation leading to dendritic cell differentiation. 2016;1–  
446 18. Available from: <http://dx.doi.org/10.1186/s13059-015-0863-2>
- 447 7. Ranasinghe C, Trivedi S, Wijesundara DK, Jackson RJ. IL-4 and IL-13 receptors: Roles in immunity  
448 and powerful vaccine adjuvants. *Cytokine Growth Factor Rev* [Internet]. 2014 Aug;25(4):437–42.  
449 Available from: <http://dx.doi.org/10.1016/j.cytogfr.2014.07.010>
- 450 8. Wang C, Ye Z, Kijlstra A, Zhou Y, Yang P. Activation of the aryl hydrocarbon receptor affects

- 451 activation and function of human monocyte-derived dendritic cells. *Clin Exp Immunol* [Internet].  
452 2014;177(2):521–30. Available from: <http://dx.doi.org/10.1111/cei.12352>
- 453 9. Goudot C, Coillard A, Villani AC, Gueguen P, Cros A, Sarkizova S, et al. Aryl Hydrocarbon  
454 Receptor Controls Monocyte Differentiation into Dendritic Cells versus Macrophages. *Immunity*  
455 [Internet]. 2017 Sep 19;47(3):582–96.e6. Available from:  
456 <http://dx.doi.org/10.1016/j.immuni.2017.08.016>
- 457 10. Le Novère N. Quantitative and logic modelling of molecular and gene networks. *Nat Rev Genet*  
458 [Internet]. 2015 Mar;16(3):146–58. Available from: <http://dx.doi.org/10.1038/nrg3885>
- 459 11. Martínez-Méndez D, Villarreal C, Mendoza L, Huerta L. An Integrative Network Modeling  
460 Approach to T CD4 Cell Activation. *Front Physiol* [Internet]. 2020 Apr 23;11:380. Available from:  
461 <http://dx.doi.org/10.3389/fphys.2020.00380>
- 462 12. Rodríguez-Jorge O, Kempis-Calanis LA, Abou-Jaoudé W, Gutiérrez-Reyna DY, Hernandez C,  
463 Ramirez-Pliego O, et al. Cooperation between T cell receptor and Toll-like receptor 5 signaling for  
464 CD4+ T cell activation. *Sci Signal* [Internet]. 2019 Apr 16;12(577). Available from:  
465 <http://dx.doi.org/10.1126/scisignal.aar3641>
- 466 13. Remy E, Rebouissou S, Chaouiya C, Zinovyev A, Radvanyi F, Calzone L. A Modeling Approach to  
467 Explain Mutually Exclusive and Co-Occurring Genetic Alterations in Bladder Tumorigenesis.  
468 *Cancer Res* [Internet]. 2015 Oct 1;75(19):4042–52. Available from: <http://dx.doi.org/10.1158/0008-5472.CAN-15-0602>
- 470 14. Naldi A, Hernandez C, Abou-Jaoudé W, Monteiro PT, Chaouiya C, Thieffry D. Logical Modeling  
471 and Analysis of Cellular Regulatory Networks With GINsim 3.0. *Front Physiol* [Internet].  
472 2018;9(June):1–16. Available from: <http://dx.doi.org/10.3389/fphys.2018.00646>
- 473 15. Collombet S, Van Oevelen C, Luis J, Ortega S, Abou-jaoudé W, Di B. Logical modeling of  
474 lymphoid and myeloid cell specification and transdifferentiation. 2016; Available from:  
475 <http://dx.doi.org/10.1073/pnas.1610622114>
- 476 16. Naldi A, Hernandez C, Levy N, Stoll G, Monteiro PT, Chaouiya C, et al. The CoLoMoTo Interactive  
477 Notebook: Accessible and Reproducible Computational Analyses for Qualitative Biological  
478 Networks. *Front Physiol* [Internet]. 2018 Jun 19;9:680. Available from:  
479 <http://dx.doi.org/10.3389/fphys.2018.00680>
- 480 17. Geissmann F, Manz MG, Jung S, Sieweke MH, Merad M, Ley K. Development of monocytes,  
481 macrophages, and dendritic cells. *Science* [Internet]. 2010 Feb 5;327(5966):656–61. Available from:  
482 <http://dx.doi.org/10.1126/science.1178331>
- 483 18. Ernst J, Kellis M. ChromHMM: automating chromatin-state discovery and characterization. *Nat*  
484 *Methods* [Internet]. 2012 Feb 28;9(3):215–6. Available from: <http://dx.doi.org/10.1038/nmeth.1906>
- 485 19. Khan A, Fornes O, Stigliani A, Gheorghe M, Castro-Mondragon JA, van der Lee R, et al. JASPAR  
486 2018: update of the open-access database of transcription factor binding profiles and its web  
487 framework. *Nucleic Acids Res* [Internet]. 2018 Jan 4;46(D1):D1284. Available from:  
488 <http://dx.doi.org/10.1093/nar/gkx1188>
- 489 20. Turatsinze J-V, Thomas-Chollier M, Defrance M, van Helden J. Using RSAT to scan genome  
490 sequences for transcription factor binding sites and cis-regulatory modules. *Nat Protoc* [Internet].

- 491 2008 Sep 18;3:1578. Available from: <https://doi.org/10.1038/nprot.2008.97>
- 492 21. Nguyen NTT, Contreras-Moreira B, Castro-Mondragon JA, Santana-Garcia W, Ossio R, Robles-  
493 Espinoza CD, et al. RSAT 2018: Regulatory sequence analysis tools 20th anniversary. *Nucleic Acids*  
494 *Res [Internet]*. 2018;46(W1):W209–14. Available from: <http://dx.doi.org/10.1093/nar/gky317>
- 495 22. McArdel SL, Terhorst C, Sharpe AH. Roles of CD48 in regulating immunity and tolerance. *Clin*  
496 *Immunol [Internet]*. 2016 Mar;164:10–20. Available from:  
497 <http://dx.doi.org/10.1016/j.clim.2016.01.008>
- 498 23. van de Laar L, Coffey PJ, Woltman AM. Regulation of dendritic cell development by GM-CSF:  
499 molecular control and implications for immune homeostasis and therapy. *Blood [Internet]*. 2012 Apr  
500 12;119(15):3383–93. Available from: <http://dx.doi.org/10.1182/blood-2011-11-370130>
- 501 24. Naldi A, Monteiro PT, Müssel C, Consortium for Logical Models and Tools, Kestler HA, Thieffry  
502 D, et al. Cooperative development of logical modelling standards and tools with CoLoMoTo.  
503 *Bioinformatics [Internet]*. 2015 Apr 1;31(7):1154–9. Available from:  
504 <http://dx.doi.org/10.1093/bioinformatics/btv013>
- 505 25. Paulevé L. Pint: A Static Analyzer for Transient Dynamics of Qualitative Networks with IPython  
506 Interface. In: *Computational Methods in Systems Biology [Internet]*. Springer International  
507 Publishing; 2017. p. 309–16. Available from: [http://dx.doi.org/10.1007/978-3-319-67471-1\\_20](http://dx.doi.org/10.1007/978-3-319-67471-1_20)
- 508 26. Bakri Y, Sarrazin S, Mayer UP, Tillmanns S, Nerlov C, Boned A, et al. Balance of MafB and PU.1  
509 specifies alternative macrophage or dendritic cell fate. *Blood [Internet]*. 2005 Apr 1;105(7):2707–16.  
510 Available from: <http://dx.doi.org/10.1182/blood-2004-04-1448>
- 511 27. Aguilera-Montilla N, Chamorro S, Nieto C, Sánchez-Cabo F, Dopazo A, Fernández-Salguero PM, et  
512 al. Aryl hydrocarbon receptor contributes to the MEK/ERK-dependent maintenance of the immature  
513 state of human dendritic cells. *Blood [Internet]*. 2013;121(15):108–18. Available from:  
514 <http://dx.doi.org/10.1182/blood-2012-07-445106.N.A.-M>
- 515 28. Sander J, Schmidt SV, Cirovic B, McGovern N, Papantonopoulou O, Hardt A-L, et al. Cellular  
516 Differentiation of Human Monocytes Is Regulated by Time-Dependent Interleukin-4 Signaling and  
517 the Transcriptional Regulator NCOR2. *Cell Immunity [Internet]*. 2017;47:1051–66. Available from:  
518 <http://dx.doi.org/10.1016/j.immuni.2017.11.024>
- 519 29. Gutsch R, Kandemir JD, Pietsch D, Cappello C, Meyer J, Simanowski K, et al. CCAAT/enhancer-  
520 binding protein beta inhibits proliferation in monocytic cells by affecting the retinoblastoma  
521 protein/E2F/cyclin E pathway but is not directly required for macrophage morphology. *J Biol Chem*  
522 *[Internet]*. 2011 Jul 1;286(26):22716–29. Available from:  
523 <http://dx.doi.org/10.1074/jbc.M110.152538>
- 524 30. Stoll G, Caron B, Viara E, Dugourd A, Zinovyev A, Naldi A, et al. MaBoSS 2.0: an environment for  
525 stochastic Boolean modeling. *Bioinformatics [Internet]*. 2017 Jul 15;33(14):2226–8. Available from:  
526 <http://dx.doi.org/10.1093/bioinformatics/btx123>
- 527 31. Stunnenberg HG, Abrignani S, Adams D, de Almeida M, Altucci L, Amin V, et al. The International  
528 Human Epigenome Consortium: A Blueprint for Scientific Collaboration and Discovery. *Cell*  
529 *[Internet]*. 2016;167(5):1145–9. Available from: <http://dx.doi.org/10.1016/j.cell.2016.11.007>
- 530 32. Yashiro T, Kasakura K, Oda Y, Kitamura N, Inoue A, Nakamura S, et al. The hematopoietic cell-

- 531 specific transcription factor PU.1 is critical for expression of CD11c. *Int Immunol* [Internet].  
532 2017;29(2):87–94. Available from: <http://dx.doi.org/10.1093/intimm/dxx009>
- 533 33. Gonzalez AG, Naldi A, Thieffry D, Chaouiya C. GINsim : A software suite for the qualitative  
534 modelling , simulation and analysis of regulatory networks. 2006;84:91–100. Available from:  
535 <http://dx.doi.org/10.1016/j.biosystems.2005.10.003>
- 536 34. Wingett SW, Andrews S. FastQ Screen: A tool for multi-genome mapping and quality control.  
537 *F1000Res* [Internet]. 2018 Aug 24;7:1338. Available from:  
538 <http://dx.doi.org/10.12688/f1000research.15931.2>
- 539 35. Bolger AM, Lohse M, Usadel B. Trimmomatic: A flexible trimmer for Illumina sequence data.  
540 *Bioinformatics* [Internet]. 2014;30(15):2114–20. Available from:  
541 <http://dx.doi.org/10.1093/bioinformatics/btu170>
- 542 36. Langdon WB. Performance of genetic programming optimised Bowtie2 on genome comparison and  
543 analytic testing (GCAT) benchmarks. *BioData Min* [Internet]. 2015 Jan 8;8(1):1. Available from:  
544 <http://dx.doi.org/10.1186/s13040-014-0034-0>
- 545 37. Landt S, Marinov G, Kundaje A, Kheradpour P, Pauli F, Batzoglou S, et al. ChIP-seq guidelines and  
546 practices of the ENCODE and modENCODE consortia. *Genome Res* [Internet]. 2012;22(Park  
547 2009):1813–31. Available from: <http://genome.cshlp.org/content/22/9/1813.short>
- 548 38. Ernst J, Kellis M. Chromatin-state discovery and genome annotation with ChromHMM. *Nat Protoc*  
549 [Internet]. 2017 Dec;12(12):2478–92. Available from: <http://dx.doi.org/10.1038/nprot.2017.124>
- 550 39. Ernst J, Kellis M. Discovery and characterization of chromatin states for systematic annotation of the  
551 human genome. *Nat Biotechnol* [Internet]. 2010 Aug;28(8):817–25. Available from:  
552 <http://dx.doi.org/10.1038/nbt.1662>
- 553 40. Law CW, Alhamdoosh M, Su S, Smyth GK, Ritchie ME. RNA-seq analysis is easy as 1-2-3 with  
554 limma, Glimma and edgeR. *F1000Res* [Internet]. 2016 Jun 17 [cited 2019 Dec 11];5(1408):1408.  
555 Available from: <https://f1000research.com/articles/5-1408/v1/pdf>
- 556 41. Leggett RM, Ramirez-Gonzalez RH, Clavijo BJ, Waite D, Davey RP. Sequencing quality  
557 assessment tools to enable data-driven informatics for high throughput genomics. *Front Genet*  
558 [Internet]. 2013 Dec 17;4:288. Available from: <http://dx.doi.org/10.3389/fgene.2013.00288>
- 559 42. Bray NL, Pimentel H, Melsted P, Pachter L. Near-optimal probabilistic RNA-seq quantification. *Nat*  
560 *Biotechnol* [Internet]. 2016;34(5):525–7. Available from: <http://dx.doi.org/10.1038/nbt.3519>
- 561 43. Sonesson C, Love MI, Robinson MD. Differential analyses for RNA-seq: transcript-level estimates  
562 improve gene-level inferences. *F1000Res* [Internet]. 2015 Dec 30;4:1521. Available from:  
563 <http://dx.doi.org/10.12688/f1000research.7563.2>
- 564 44. Robinson MD, McCarthy DJ, Smyth GK. edgeR: a Bioconductor package for differential expression  
565 analysis of digital gene expression data. *Bioinformatics* [Internet]. 2010 Jan 1;26(1):139–40.  
566 Available from: <http://dx.doi.org/10.1093/bioinformatics/btp616>
- 567





# Figure 2

(a)

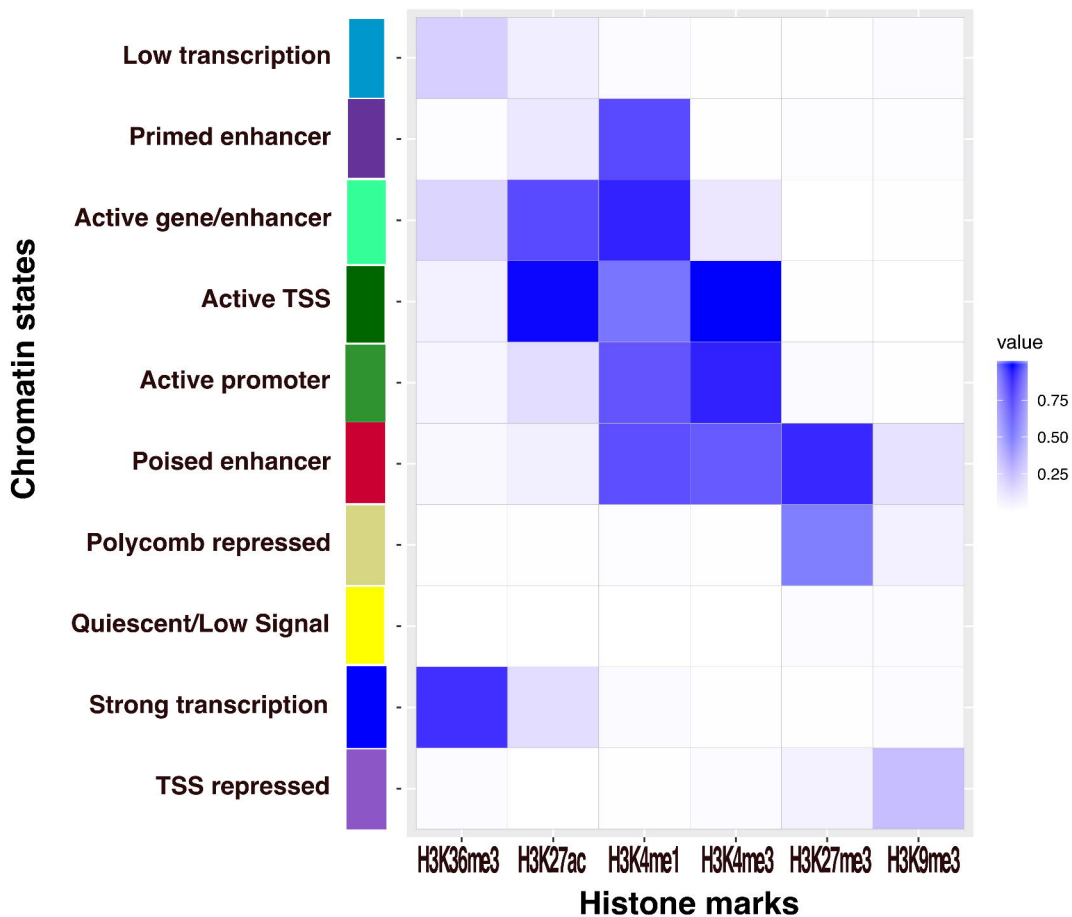

(b)

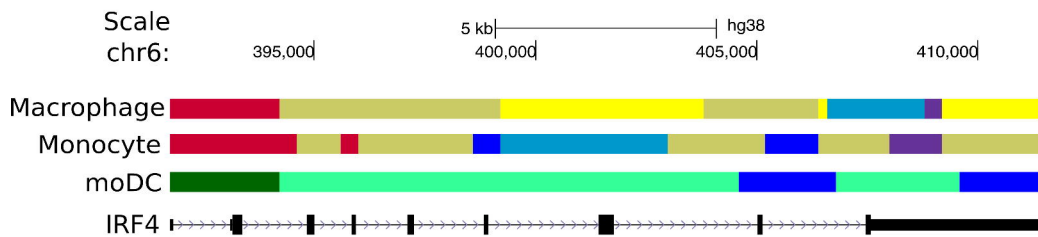



**Figure 3**

(a)

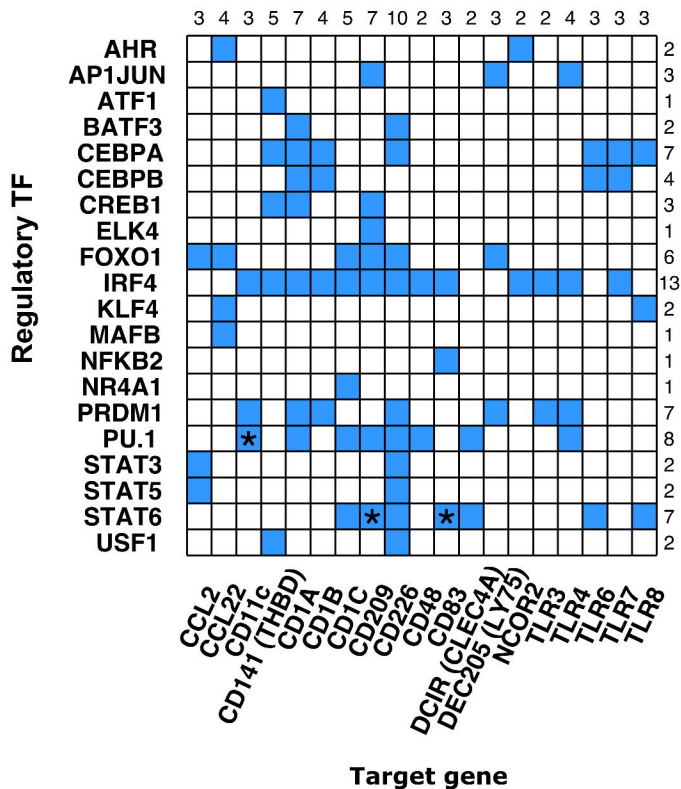

(b)

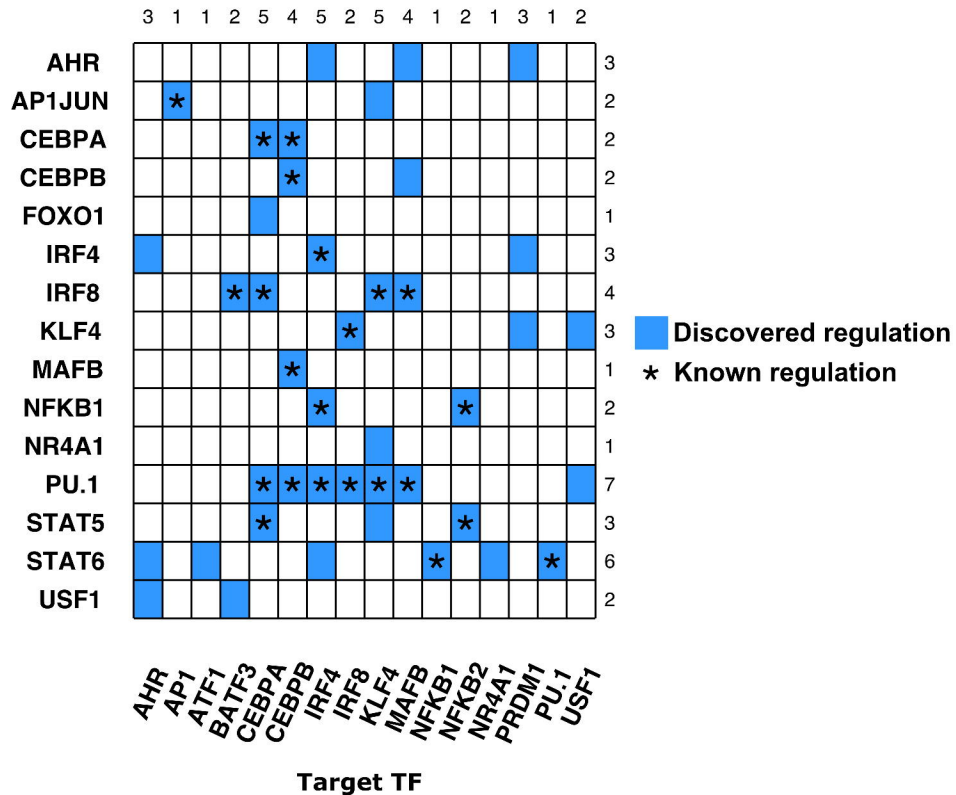

**Figure 4**

bioRxiv preprint doi: <https://doi.org/10.1101/2020.08.14.251710>; this version posted August 14, 2020. The copyright holder for this preprint (which was not certified by peer review) is the author/funder, who has granted bioRxiv a license to display the preprint in perpetuity. It is made available under aCC-BY-NC 4.0 International license.

**(a)**

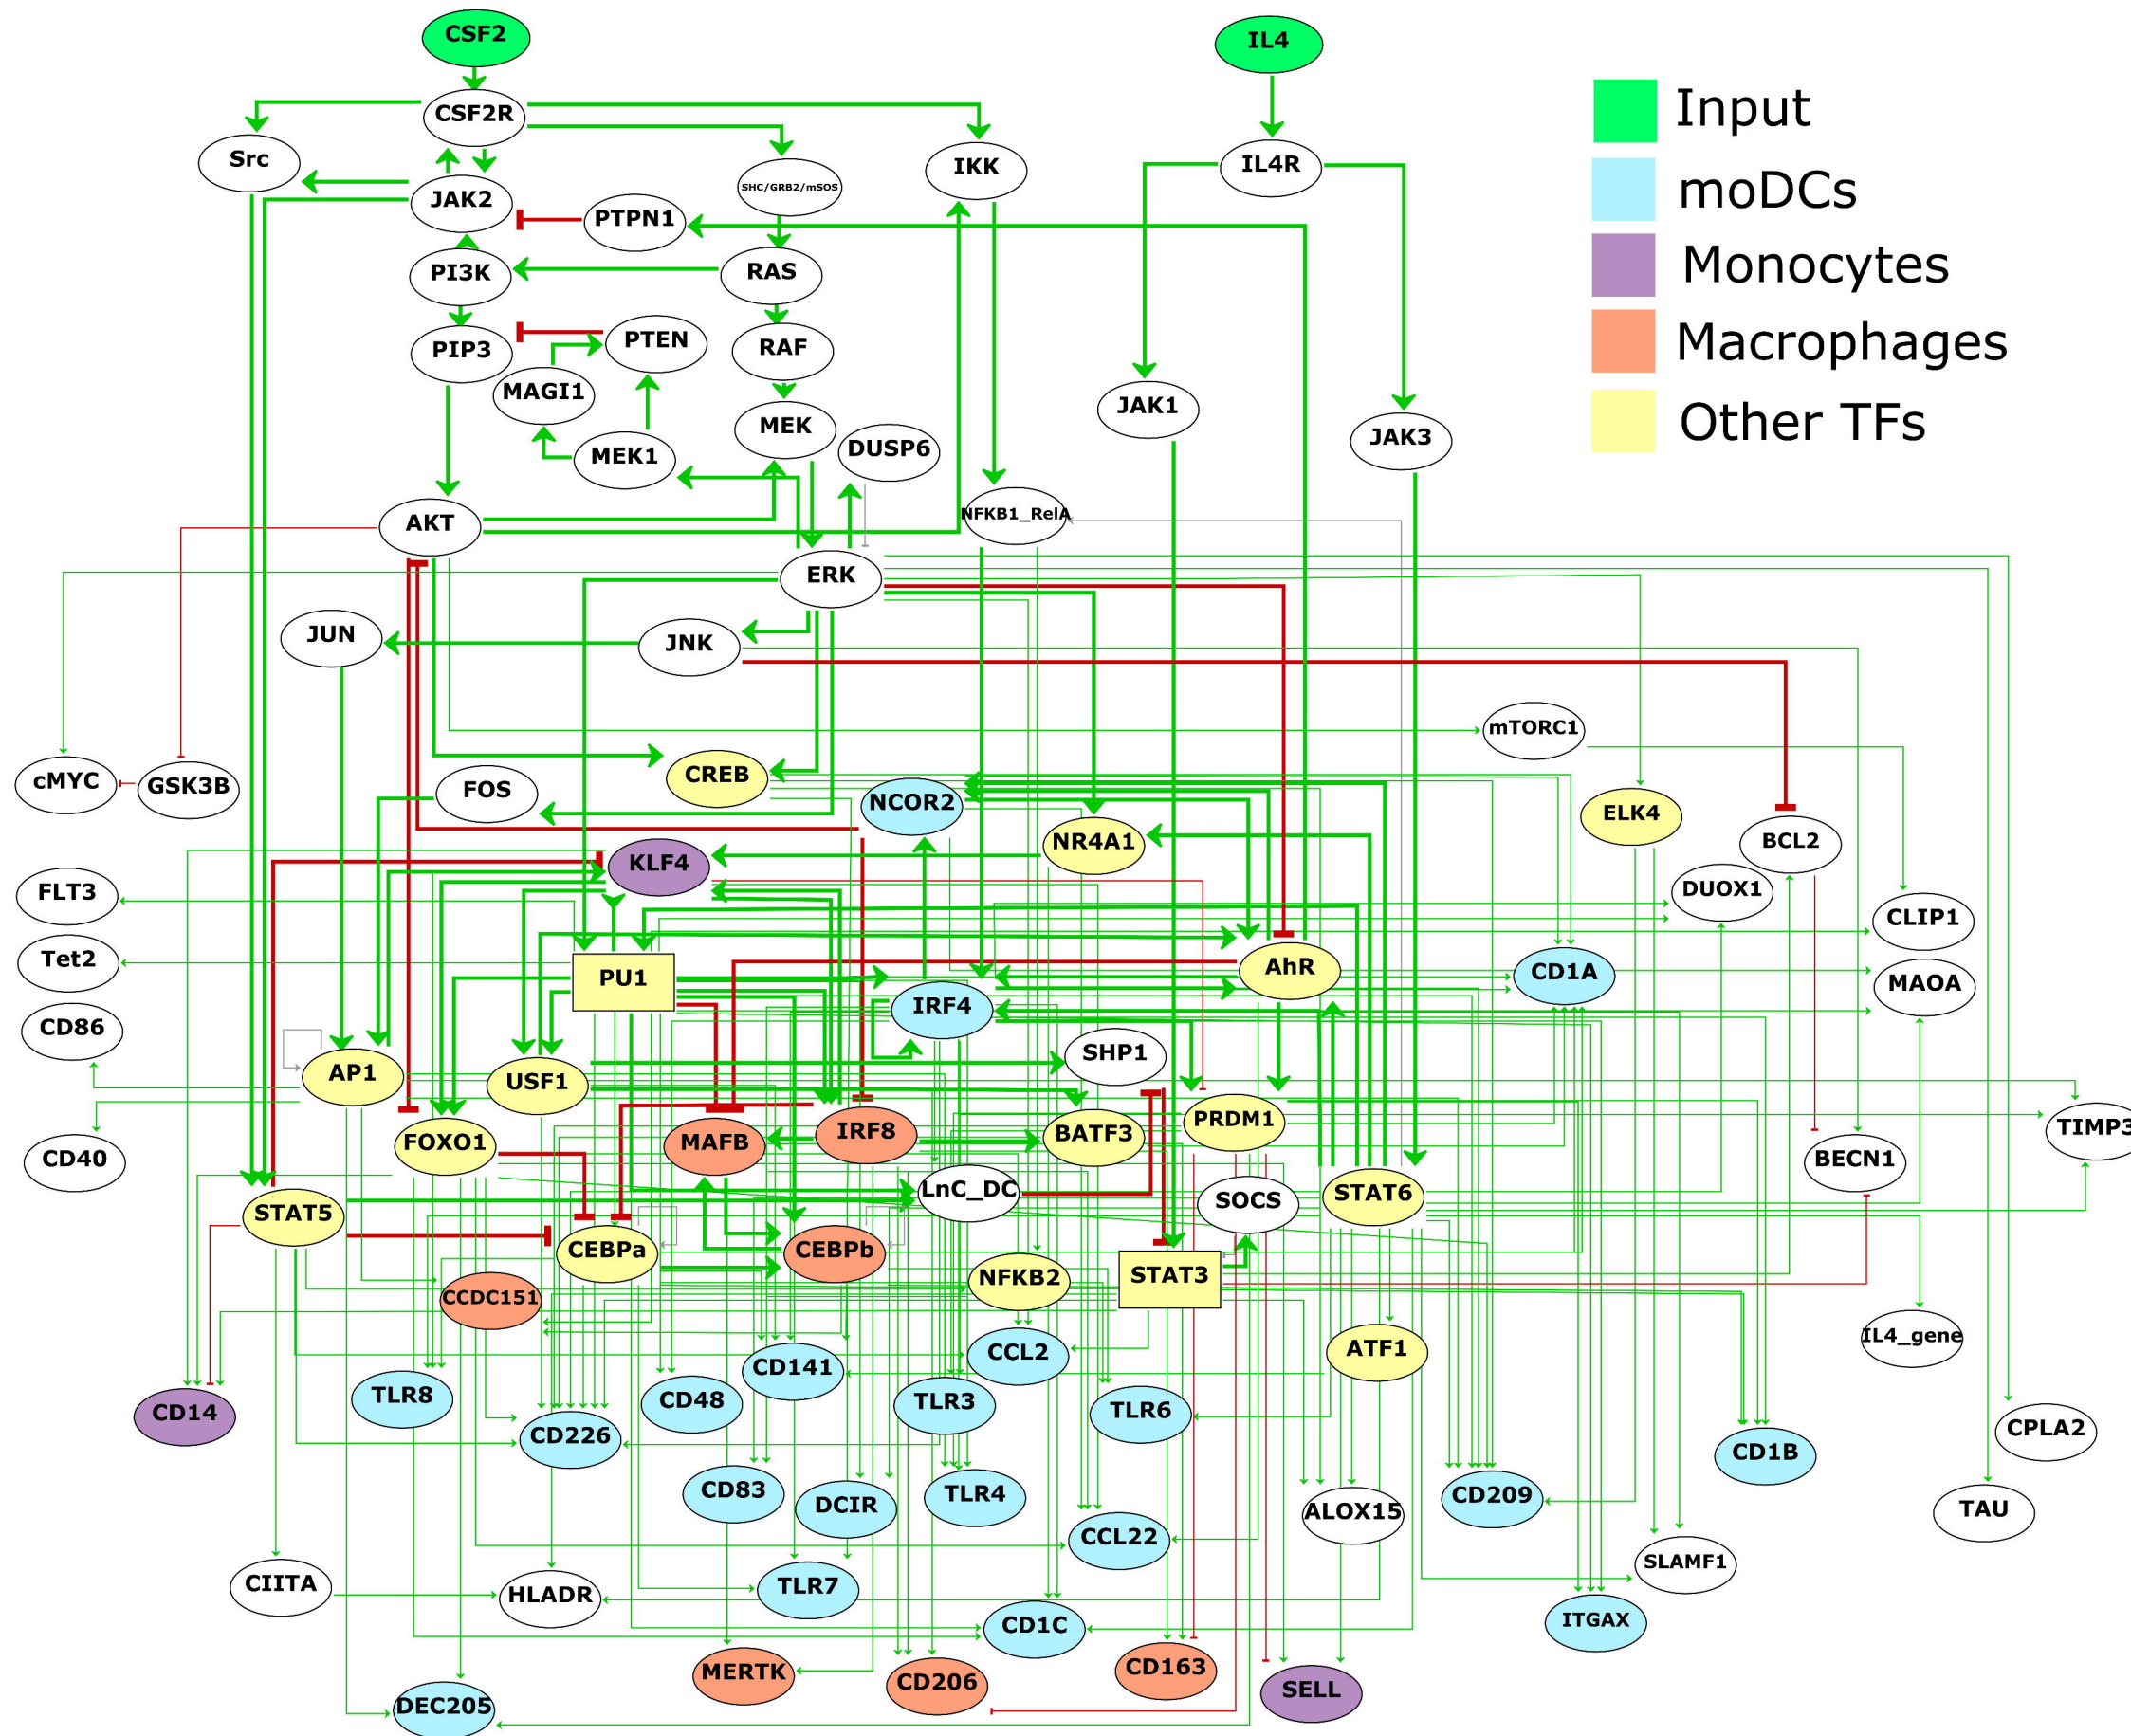

**(b)**

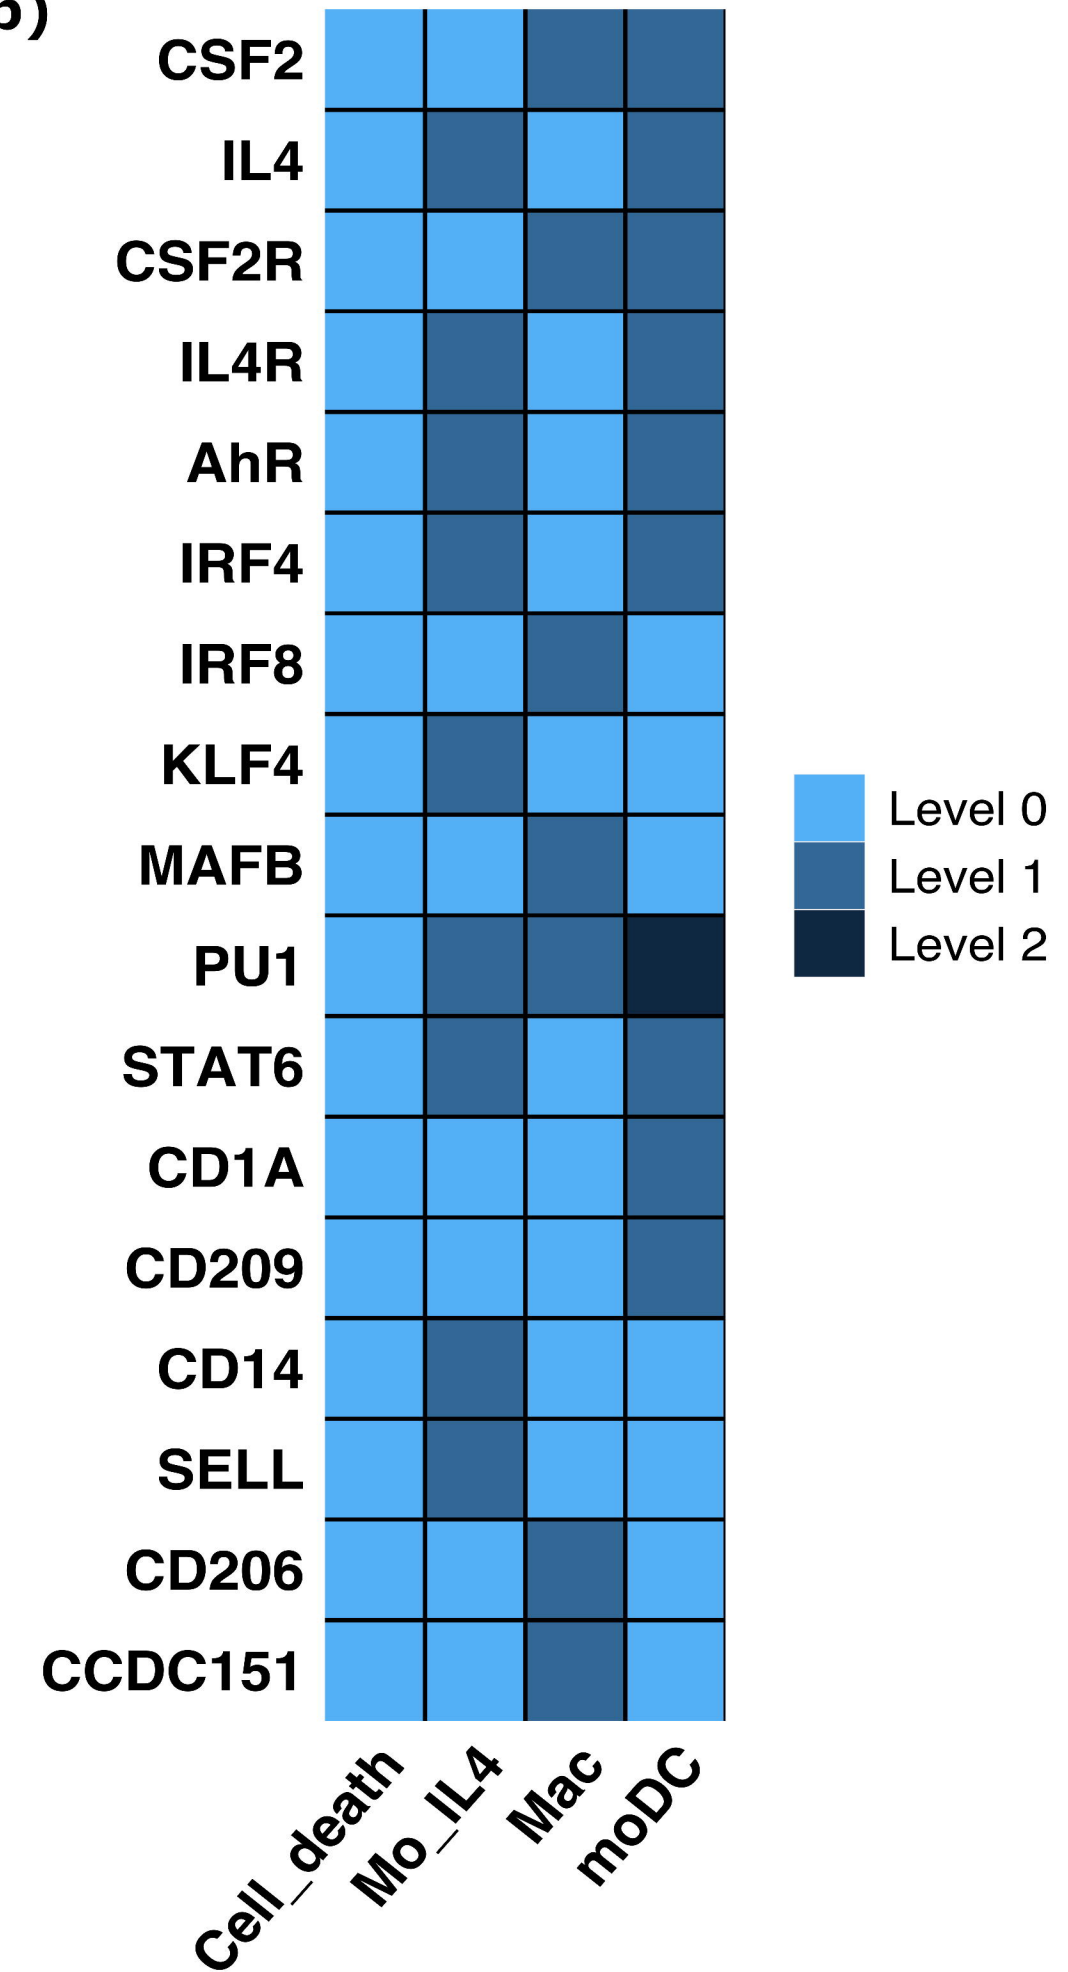

# Figure 5

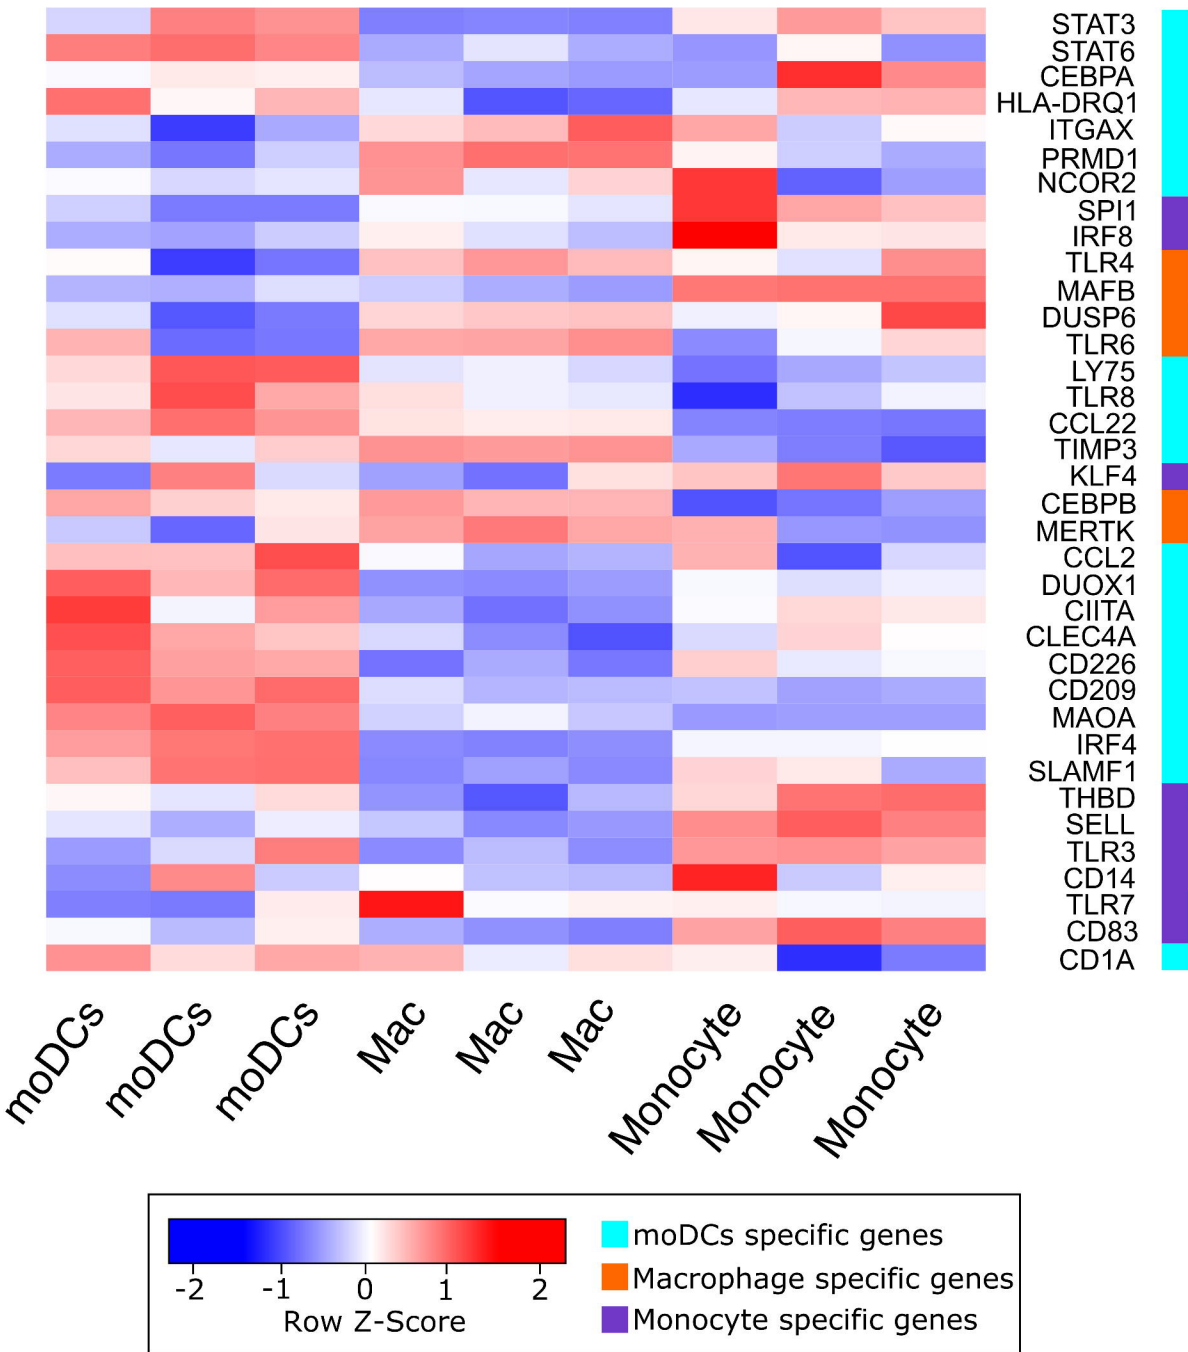

# Figure 6

Clustered heatmap of each stable states found for each perturbation

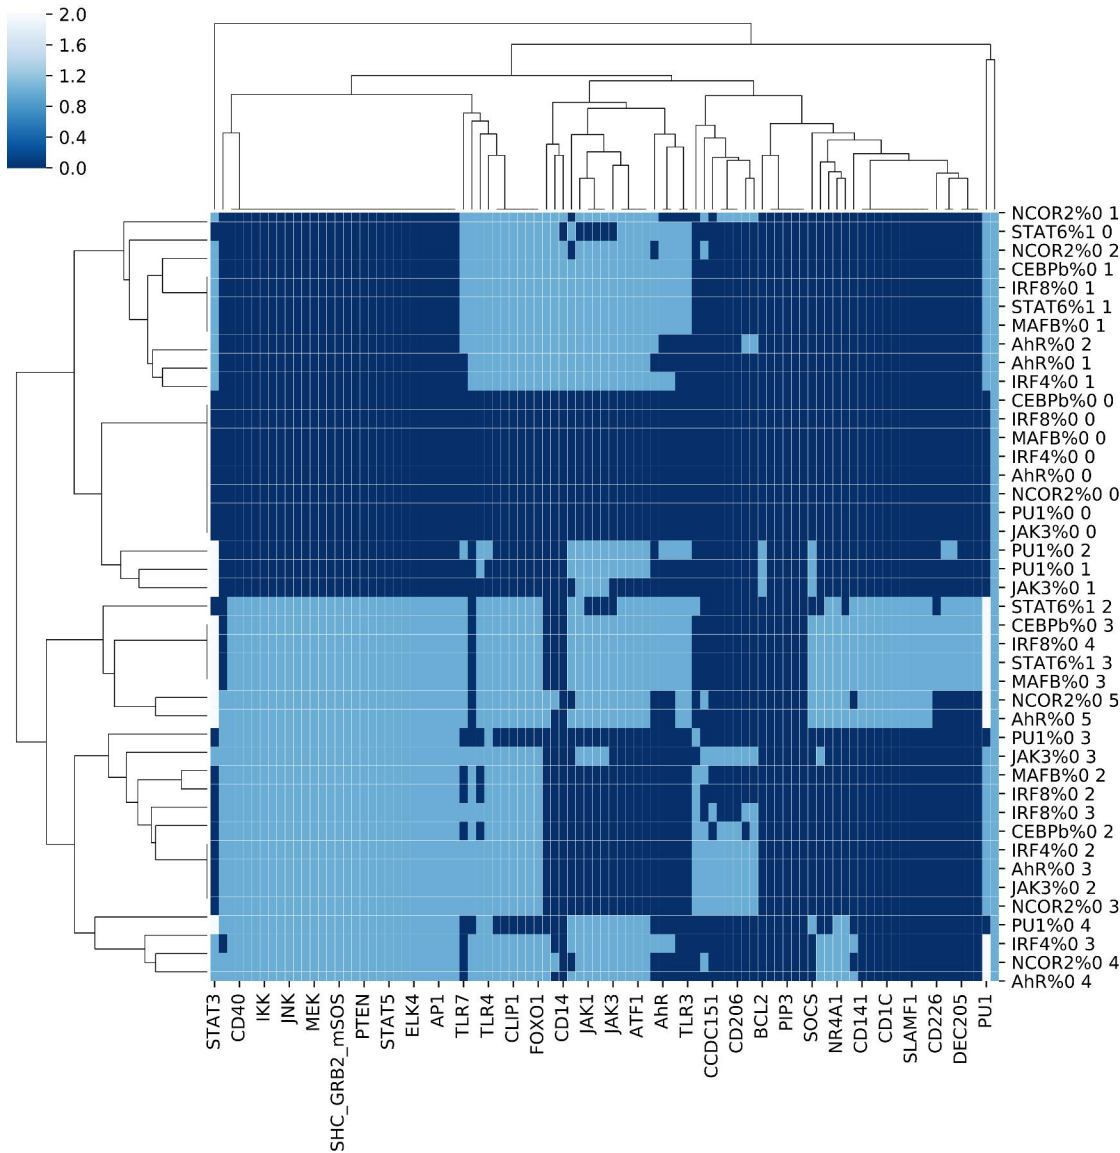

**Figure 7**

**Initial conditions: IL4**

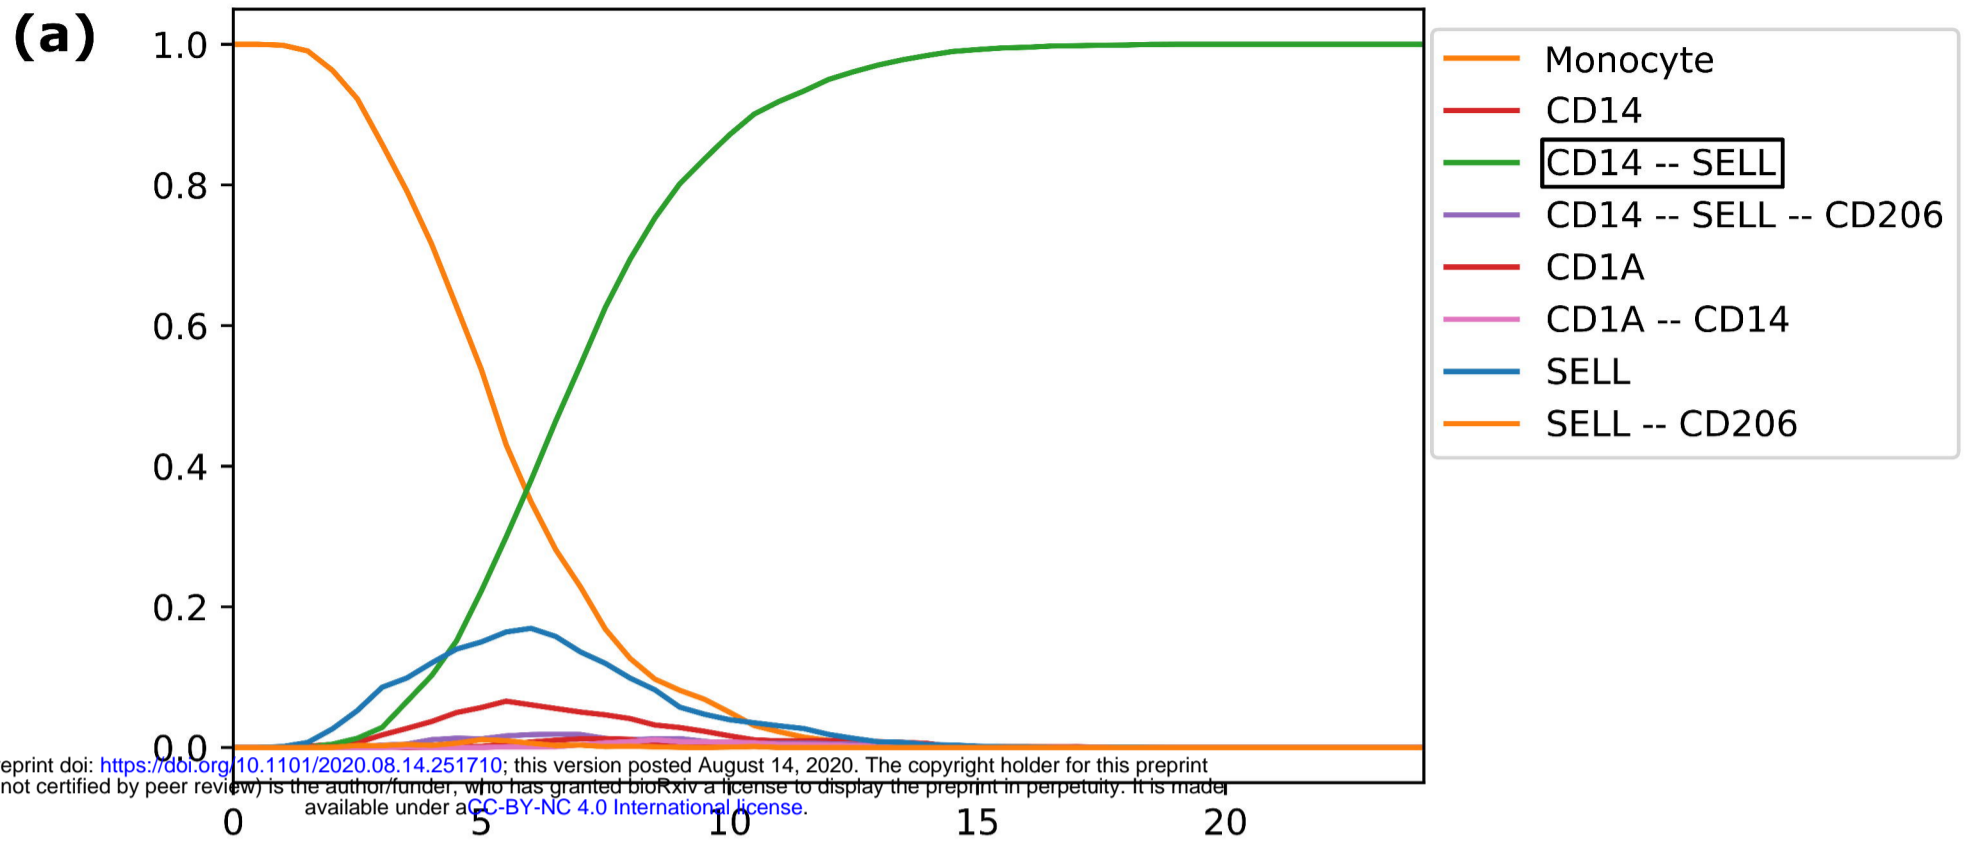

**Initial conditions: CSF2**

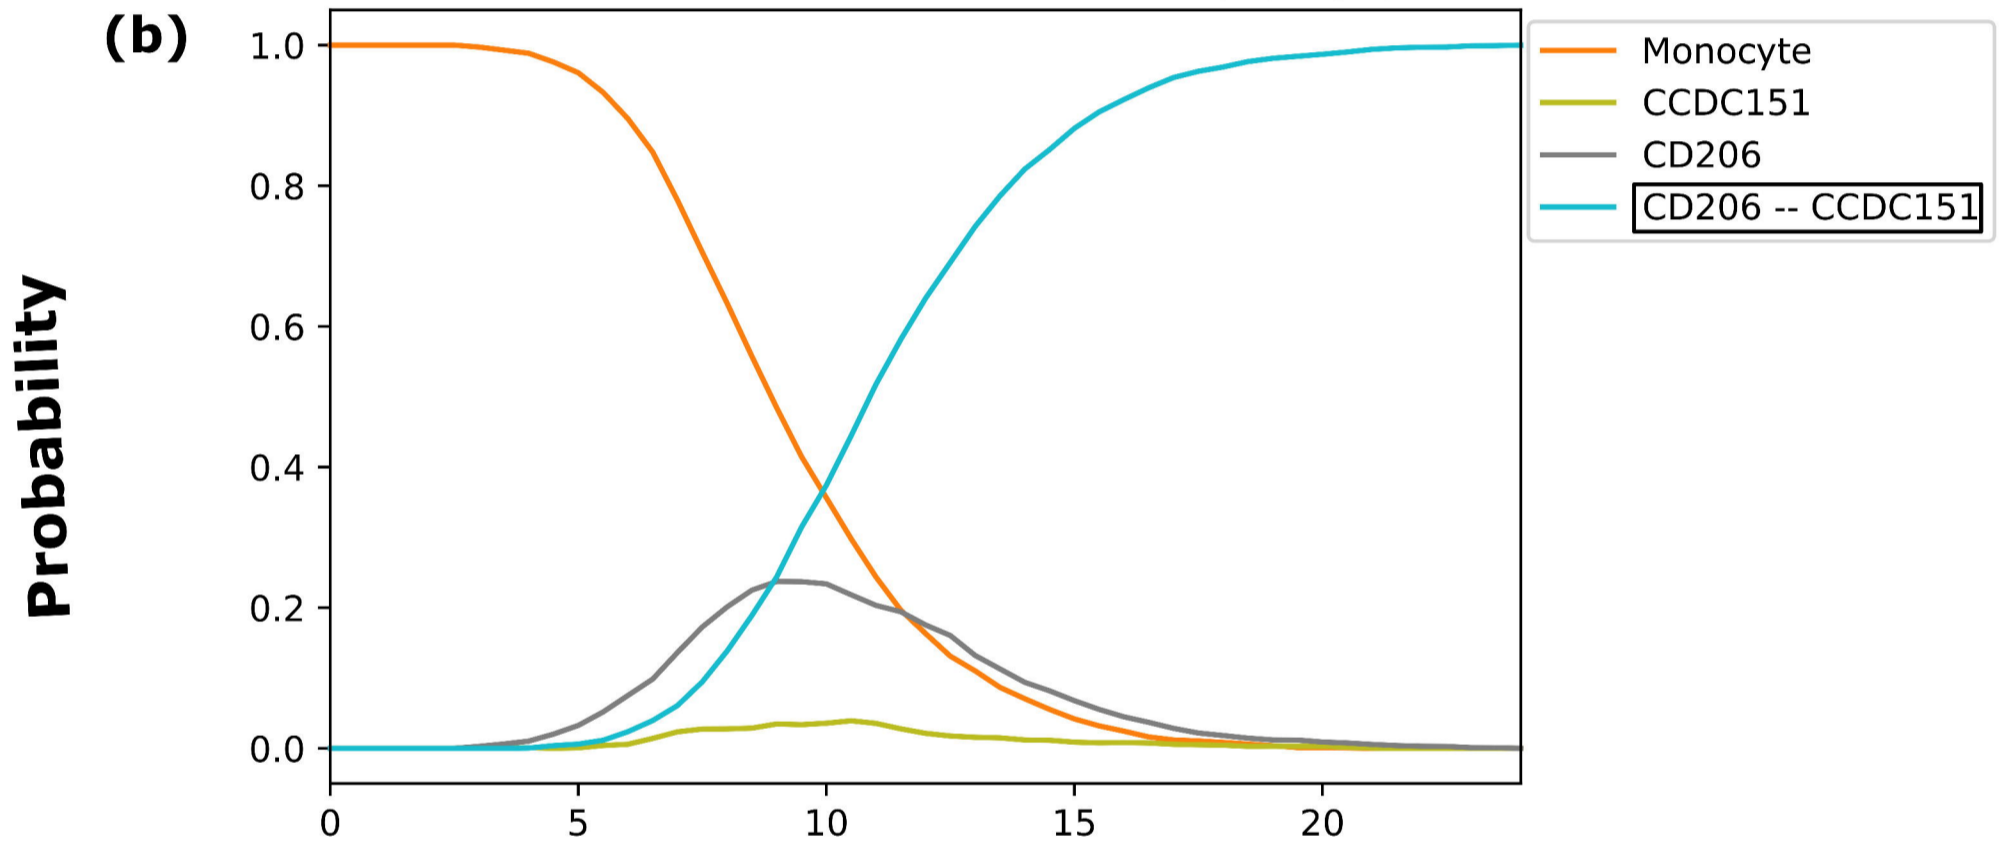

**Initial conditions: CSF2 and IL4**

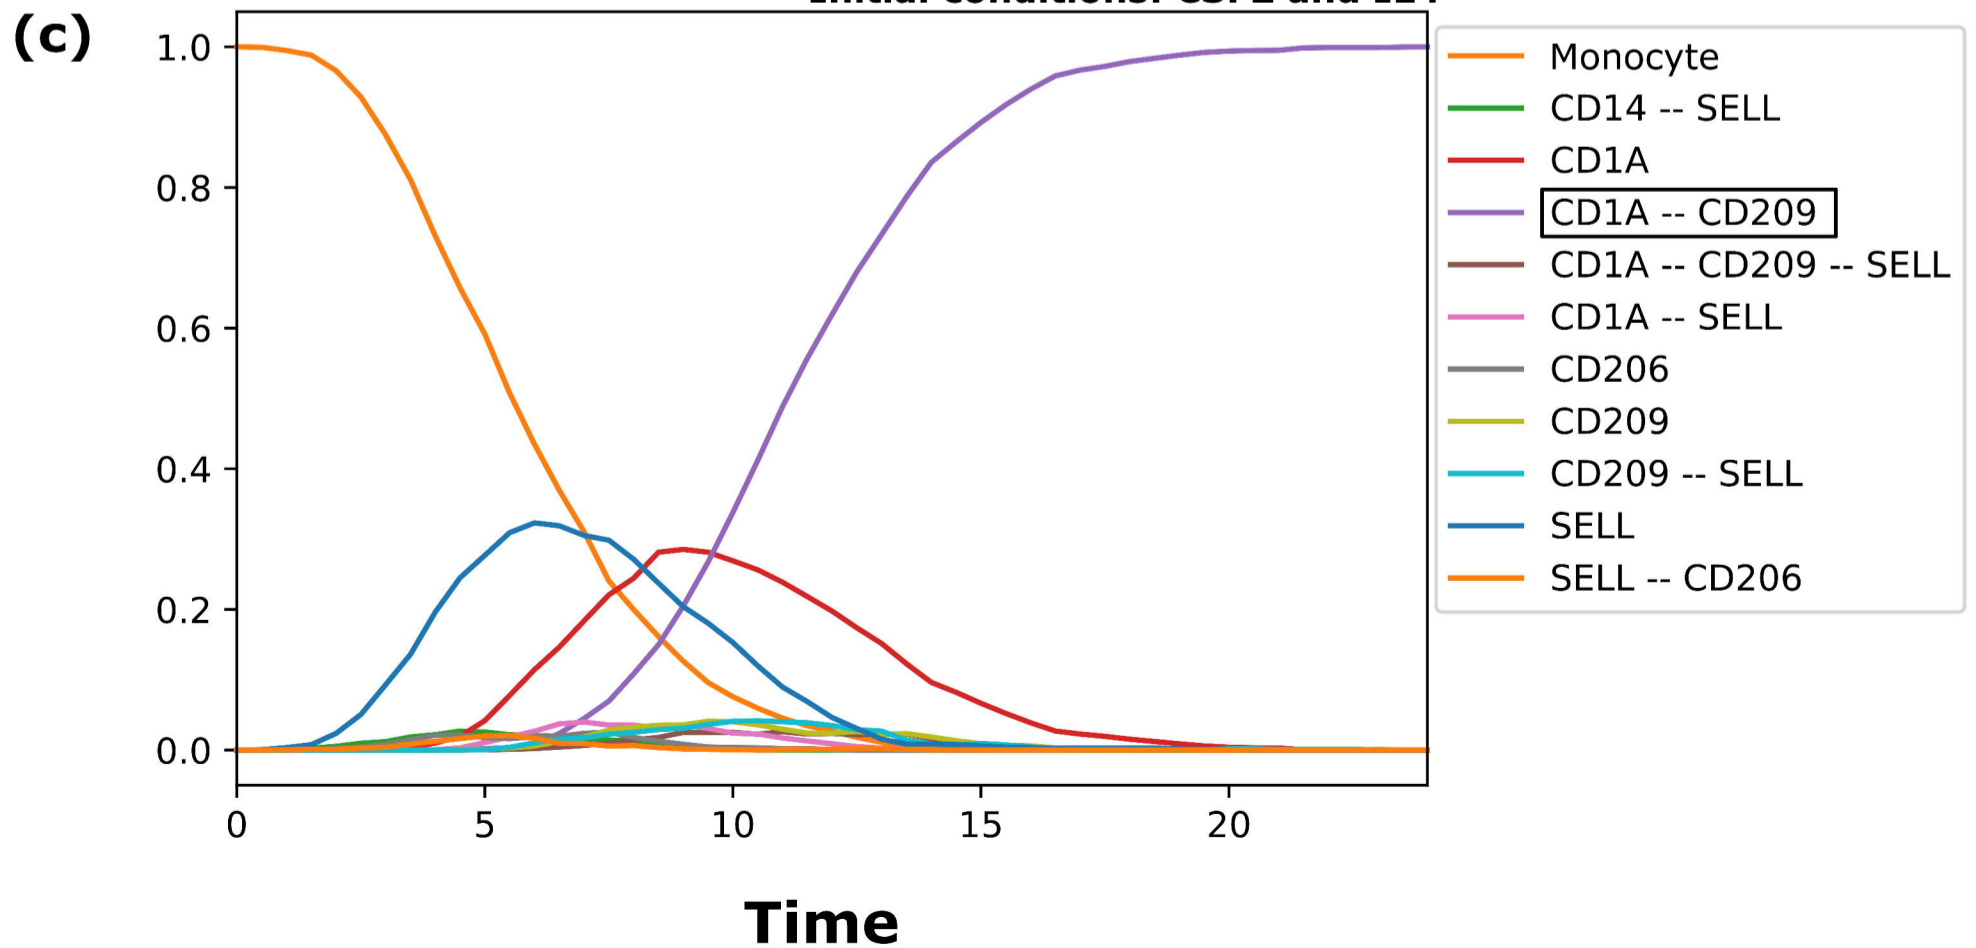

Source: https://www.biorxiv.org/content/10.1101/2020.08.14.251710v1.full.pdf
